# Supplementary material for: Molecular Epidemiology of Methicillin-Susceptible and Methicillin-Resistant Staphylococcus aureus in Wild, Captive and Laboratory Rats: Effect of Habitat on the Nasal S. aureus Population
Source: Toxins (Basel). 2020 Jan 24;12(2):80. doi: 10.3390/toxins12020080 (PMC7076793; doi:10.3390/toxins12020080)
Supplement: Supplementary file 1 [file toxins-12-00080-s001.xlsx]

## Sheet: Tab_S1_methods_wild rats
Table S1: Description of the geographical origin, habitat and capture method of free-living wild rats (N=145).
Country	State	Location	No.	S. aureus+	Habitat	Capture method	Study related	Capture permit	Contact1	Sacrifice
CZE	MSR	Nový Jičín	29	18	pheasant farm	hunting dogs	no (pest control measures)	not required	other animals (pheasants, dogs)	hunting dogs
GER	MV	Island of Koos	18	4	fields and meadows	electric traps	no (pest control measures)	not required	other animals (wild ducks)	electric traps
GER	BW	Stuttgart	17	1	city, rural area, premise of a zoo	bait poison and mechanical traps	no (pest control measures)	not required	farm animals, other animals, humans	bait poison, mechanical trap
GER	NRW_1	different locations	49	4	town (22), close to settlements (3), farm (3), meat processing (21)	snap traps, anticoagulants (brodifacoum)	no (pest control measures)	not required	wildlife (mice, birds), farm animals (cows, pigs), humans	snap traps: cervical dislocation, anticoagulants (brodifacoum)
GER	NRW_2	farms	32	10	livestock farms, rural areas in the Münsterland	live traps, snap traps, or found dead on site	live-traps: grant No. 3714 67 40702	North Rhine-Westphalia State Agency for Nature, Environment and Consumer Protection, No. 84-02.04.2015.A279 (03.11.2015)	wildlife, farm animals, humans	snap traps: cervical dislocation, anticoagulants (brodifacoum)
1 contact with farm animals, other animals, and/or humans
2 2014-2018 Effectiveness and optimization of risk mitigation measures for the use of biocidal anticoagulant rodenticides with high environmental risk
Abbreviations: BW, Baden-Württemberg; CZE, Czech Republic; FLI, Friedrich-Loeffler-Institute (Federal Research Institute for Animal Health); GER, Germany; MSR, Moravian-Silesian Region; MV, Mecklenburg Western Pomerania; No., number; NRW, North Rhine-Westphalia (NRW_1; NRW_2, please refer to supplementary Table S2)

## Sheet: Tab_S2_wild rats
Table S2: Overview of the wild rats included in this study, their origin, characteristics and nasal S. aureus colonization.
Strain ID	Country	State	Location	Probable contact to humans1	Probable contact to livestock1	Year	Species2	Weight (g)	Sex	S. aureus
KS/17/133	GER	MV	fields and meadows	-	-	2015	R. norvegicus	390	f	+
KS/17/134	GER	MV	fields and meadows	-	-	2015	R. norvegicus	63	m	+
KS/17/135	GER	MV	fields and meadows	-	-	2015	R. norvegicus	274	f	-
KS/17/136	GER	MV	fields and meadows	-	-	2015	R. norvegicus	104	f	-
KS/17/137	GER	MV	fields and meadows	-	-	2015	R. norvegicus	135	ND	+
KS/17/138	GER	MV	fields and meadows	-	-	2015	R. norvegicus	60	m	-
KS/17/139	GER	MV	fields and meadows	-	-	2015	R. norvegicus	74	f	-
KS/17/140	GER	MV	fields and meadows	-	-	2015	R. norvegicus	71	m	-
KS/17/141	GER	MV	fields and meadows	-	-	2015	R. norvegicus	42	m	-
KS/17/142	GER	MV	fields and meadows	-	-	2015	R. norvegicus	49	m	-
KS/17/143	GER	MV	fields and meadows	-	-	2015	R. norvegicus	390	m	-
KS/17/144	GER	MV	fields and meadows	-	-	2015	R. norvegicus	91	f	-
KS/17/145	GER	MV	fields and meadows	-	-	2015	R. norvegicus	43	m	-
KS/17/146	GER	MV	fields and meadows	-	-	2015	R. norvegicus	420	f	+
KS/17/737	GER	MV	fields and meadows	-	-	2017	R. norvegicus	50	m	-
KS/17/738	GER	MV	fields and meadows	-	-	2017	R. norvegicus	50	m	-
KS/17/739	GER	MV	fields and meadows	-	-	2017	R. norvegicus	60	f	-
KS/17/740	GER	MV	fields and meadows	-	-	2017	R. norvegicus	110	m	-
KS/17/167	GER	NRW_13	town	++	-	2016	R. norvegicus	103	m	-
KS/17/168	GER	NRW_1	meat processing, close to settlements	+	-	2016	R. norvegicus	71	m	-
KS/17/169	GER	NRW_1	town	++	-	2016	R. norvegicus	33	f	-
KS/17/170	GER	NRW_1	town	++	-	2016	R. norvegicus	53	f	-
KS/17/171	GER	NRW_1	town	++	-	2016	R. norvegicus	59	m	-
KS/17/172	GER	NRW_1	meat processing, close to settlements	+	-	2016	R. norvegicus	228	m	+
KS/17/173	GER	NRW_1	town	++	-	2016	R. norvegicus	49	f	-
KS/17/174	GER	NRW_1	meat processing, close to settlements	+	-	2016	R. norvegicus	78	m	-
KS/17/175	GER	NRW_1	town	++	-	2016	R. norvegicus	52	m	+
KS/17/176	GER	NRW_1	town	++	-	2016	R. norvegicus	83	m	-
KS/17/177	GER	NRW_1	meat processing, close to settlements	+	-	2016	R. norvegicus	77	m	-
KS/17/178	GER	NRW_1	town	++	-	2016	R. norvegicus	34	m	-
KS/17/179	GER	NRW_1	meat processing, close to settlements	+	-	2016	R. norvegicus	54	ND	-
KS/17/180	GER	NRW_1	meat processing, close to settlements	+	-	2016	R. norvegicus	46	m	-
KS/17/181	GER	NRW_1	town	++	-	2016	R. norvegicus	86	m	-
KS/17/182	GER	NRW_1	town	++	-	2016	R. norvegicus	77	m	-
KS/17/183	GER	NRW_1	town	++	-	2016	R. norvegicus	61	f	-
KS/17/184	GER	NRW_1	town	++	-	2016	R. norvegicus	291	f	-
KS/17/185	GER	NRW_1	town	++	-	2016	R. norvegicus	49	f	-
KS/17/186	GER	NRW_1	close to settlements	+	-	2016	R. norvegicus	372	m	+
KS/17/334	CZE	MSR	pheasant farm	+	-	2013**	R. norvegicus	355	f	+
KS/17/335	CZE	MSR	pheasant farm	+	-	2013**	R. norvegicus	490	m	+
KS/17/336	CZE	MSR	pheasant farm	+	-	2013**	R. norvegicus	304	f	+
KS/17/337	CZE	MSR	pheasant farm	+	-	2013**	R. norvegicus	355	f	-
KS/17/338	CZE	MSR	pheasant farm	+	-	2013**	R. norvegicus	330	m	-
KS/17/339	CZE	MSR	pheasant farm	+	-	2013**	R. norvegicus	188	f	+
KS/17/340	CZE	MSR	pheasant farm	+	-	2013**	R. norvegicus	38	m	+
KS/17/341	CZE	MSR	pheasant farm	+	-	2013**	R. norvegicus	316	f	+
KS/17/342	CZE	MSR	pheasant farm	+	-	2013**	R. norvegicus	352	m	-
KS/17/343	CZE	MSR	pheasant farm	+	-	2013**	R. norvegicus	355	f	+
KS/17/344	CZE	MSR	pheasant farm	+	-	2013**	R. norvegicus	395	m	-
KS/17/345	CZE	MSR	pheasant farm	+	-	2013**	R. norvegicus	377	m	+
KS/17/346	CZE	MSR	pheasant farm	+	-	2013**	R. norvegicus	334	m	-
KS/17/347	CZE	MSR	pheasant farm	+	-	2013**	R. norvegicus	429	f	-
KS/17/348	CZE	MSR	pheasant farm	+	-	2013**	R. norvegicus	390	m	+
KS/17/349	CZE	MSR	pheasant farm	+	-	2013**	R. norvegicus	371	f	+
KS/17/350	CZE	MSR	pheasant farm	+	-	2013**	R. norvegicus	357	f	+
KS/17/351	CZE	MSR	pheasant farm	+	-	2013**	R. norvegicus	359	f	-
KS/17/352	CZE	MSR	pheasant farm	+	-	2013**	R. norvegicus	279	f	-
KS/17/353	CZE	MSR	pheasant farm	+	-	2013**	R. norvegicus	357	m	+
KS/17/354	CZE	MSR	pheasant farm	+	-	2013**	R. norvegicus	380	f	-
KS/17/355	CZE	MSR	pheasant farm	+	-	2013**	R. norvegicus	28	f	-
KS/17/356	CZE	MSR	pheasant farm	+	-	2013**	R. norvegicus	355	f	+
KS/17/357	CZE	MSR	pheasant farm	+	-	2013**	R. norvegicus	448	m	+
KS/17/358	CZE	MSR	pheasant farm	+	-	2013**	R. norvegicus	358	f	+
KS/17/359	CZE	MSR	pheasant farm	+	-	2013**	R. norvegicus	342	f	+
KS/17/360	CZE	MSR	pheasant farm	+	-	2013**	R. norvegicus	264	f	+
KS/17/361	CZE	MSR	pheasant farm	+	-	2013**	R. norvegicus	372	m	-
KS/17/362	CZE	MSR	pheasant farm	+	-	2013**	R. norvegicus	353	m	+
KS/18/171	GER	NRW_23	livestock farms	+	++	2017	R. norvegicus	89.6	m	-
KS/18/172	GER	NRW_2	livestock farms	+	++	2016	R. norvegicus	184	f	-
KS/18/173	GER	NRW_2	livestock farms	+	++	2016	R. norvegicus	458.1	m	+
KS/18/174	GER	NRW_2	livestock farms	+	++	NA	R. norvegicus	340.4	f	-
KS/18/175	GER	NRW_2	livestock farms	+	++	2016	R. norvegicus	278.9	m	-
KS/18/176	GER	NRW_2	livestock farms	+	++	2016	R. norvegicus	335.7	m	-
KS/18/177	GER	NRW_2	livestock farms	+	++	2016	R. norvegicus	458.8	m	+
KS/18/178	GER	NRW_2	livestock farms	+	++	2017	R. norvegicus	151.4	f	-
KS/18/179	GER	NRW_2	livestock farms	+	++	2016	R. norvegicus	297.5	f	+
KS/18/180	GER	NRW_2	livestock farms	+	++	2016	R. norvegicus	103.5	f	-
KS/18/181	GER	NRW_2	livestock farms	+	++	2016	R. norvegicus	58.4	m	-
KS/18/182	GER	NRW_2	livestock farms	+	++	2016	R. norvegicus	85.1	m	-
KS/18/183	GER	NRW_2	livestock farms	+	++	2016	R. norvegicus	280.1	f	-
KS/18/184	GER	NRW_2	livestock farms	+	++	2016	R. norvegicus	187.1	m	-
KS/18/185	GER	NRW_2	livestock farms	+	++	2016	R. norvegicus	232.9	m	-
KS/18/186	GER	NRW_2	livestock farms	+	++	2016	R. norvegicus	343.2	f	+
KS/18/187	GER	NRW_2	livestock farms	+	++	2016	R. norvegicus	207.6	f	+
KS/18/188	GER	NRW_2	livestock farms	+	++	2016	R. norvegicus	226.1	f	-
KS/18/189	GER	NRW_2	livestock farms	+	++	2016	R. norvegicus	372.1	f	+
KS/18/190	GER	NRW_2	livestock farms	+	++	2016	R. norvegicus	334.4	m	+
KS/18/191	GER	NRW_2	livestock farms	+	++	2016	R. norvegicus	356.6	m	-
KS/18/192	GER	NRW_2	livestock farms	+	++	2016	R. norvegicus	316.2	f	-
KS/18/193	GER	NRW_2	livestock farms	+	++	2016	R. norvegicus	169.3	m	-
KS/18/194	GER	NRW_2	livestock farms	+	++	2016	R. norvegicus	304.3	m	+
KS/18/195	GER	NRW_2	livestock farms	+	++	2016	R. norvegicus	184.8	m	-
KS/18/196	GER	NRW_2	livestock farms	+	++	2016	R. norvegicus	466.6	f	-
KS/18/198	GER	NRW_2	livestock farms	+	++	2016	R. norvegicus	339.1	f	-
KS/18/199	GER	NRW_2	livestock farms	+	++	2016	R. norvegicus	389	m	-
KS/18/200	GER	NRW_2	livestock farms	+	++	2016	R. norvegicus	478.1	m	-
KS/18/201	GER	NRW_2	livestock farms	+	++	2016	R. norvegicus	472.6	m	+
KS/18/202	GER	NRW_2	livestock farms	+	++	2016	R. norvegicus	366.4	f	-
KS/18/203	GER	NRW_2	livestock farms	+	++	2016	R. norvegicus	426.1	m	+
KS/18/1578	GER	NRW_1	meat processing, close to settlements	+	-	2014	R. norvegicus	242.6	f	-
KS/18/1579	GER	NRW_1	town	++	-	2015	R. norvegicus	339.2	f	-
KS/18/1580	GER	NRW_1	close to settlements	+	-	2015	R. norvegicus	137.5	f	-
KS/18/1581	GER	NRW_1	town	++	-	2015	R. norvegicus	236.9	m	-
KS/18/1582	GER	NRW_1	meat processing, close to settlements	+	-	2016	R. norvegicus	69.7	m	-
KS/18/1583	GER	NRW_1	farm, close to settlements	+	++	2014	R. norvegicus	228.5	m	+
KS/18/1584	GER	NRW_1	meat processing, close to settlements	+	-	2015	R. norvegicus	83.5	f	-
KS/18/1586	GER	NRW_1	meat processing, close to settlements	+	-	2014	R. norvegicus	203.4	f	-
KS/18/1587	GER	NRW_1	town	++	-	2012	R. norvegicus	126.8	f	-
KS/18/1588	GER	NRW_1	meat processing, close to settlements	+	-	2015	R. norvegicus	227.9	m	-
KS/18/1589	GER	NRW_1	close to settlements	+	-	2012	R. norvegicus	178	m	-
KS/18/1590	GER	NRW_1	town	++	-	2012	R. norvegicus	126.2	m	-
KS/18/1591	GER	NRW_1	farm, close to settlements	+	++	2014	R. norvegicus	193.8	m	-
KS/18/1592	GER	NRW_1	town	++	-	2011	R. norvegicus	120.5	f	-
KS/18/1593	GER	NRW_1	town	++	-	2011	R. norvegicus	87	m	-
KS/18/1594	GER	NRW_1	farm, close to settlements	+	++	2012	R. norvegicus	58.7	m	-
KS/18/1595	GER	NRW_1	town	++	-	2011	R. norvegicus	115.5	f	-
KS/18/1596	GER	NRW_1	meat processing, close to settlements	+	-	2015	R. norvegicus	407.5	m	-
KS/18/1597	GER	NRW_1	meat processing, close to settlements	+	-	2016	R. norvegicus	370.6	f	-
KS/18/1598	GER	NRW_1	meat processing, close to settlements	+	-	2015	R. norvegicus	260.6	f	-
KS/18/1599	GER	NRW_1	meat processing, close to settlements	+	-	2014	R. norvegicus	359.7	f	-
KS/18/1600	GER	NRW_1	meat processing, close to settlements	+	-	2015	R. norvegicus	233	m	-
KS/18/1601	GER	NRW_1	meat processing, close to settlements	+	-	2015	R. norvegicus	411.9	m	-
KS/18/1602	GER	NRW_1	town	++	-	2011	R. norvegicus	142.4	f	-
KS/18/1603	GER	NRW_1	close to settlements	+	-	2015	R. norvegicus	131.8	f	-
KS/18/1604	GER	NRW_1	meat processing, close to settlements	+	-	2016	R. norvegicus	98.4	f	-
KS/18/1606	GER	NRW_1	meat processing, close to settlements	+	-	2015	R. norvegicus	201.4	m	-
KS/18/1607	GER	NRW_1	meat processing, close to settlements	+	-	2015	R. norvegicus	86.8	m	-
KS/18/1608	GER	NRW_1	meat processing, close to settlements	+	-	2015	R. norvegicus	220.8	f	-
KS/17/370*	GER	BW	zoo, pest animal	+	+	2010	R. norvegicus	365	m	-
KS/17/371*	GER	BW	zoo, pest animal	+	+	2010	R. norvegicus	290	m	-
KS/17/372*	GER	BW	zoo, pest animal	+	+	2012**	R. norvegicus	83	m	-
KS/17/373*	GER	BW	zoo, pest animal	+	+	2012**	R. norvegicus	343	m	-
KS/17/374*	GER	BW	zoo, pest animal	+	+	2012**	R. norvegicus	56	m	-
KS/17/375*	GER	BW	zoo, pest animal	+	+	2012**	R. norvegicus	86	m	-
KS/17/376*	GER	BW	zoo, pest animal	+	+	2012**	R. norvegicus	257	m	-
KS/17/377*	GER	BW	zoo, pest animal	+	+	2012**	R. norvegicus	59	f	-
KS/17/378*	GER	BW	zoo, pest animal	+	+	2012**	R. norvegicus	252	f	+
KS/17/379*	GER	BW	zoo, pest animal	+	+	2012**	R. norvegicus	210	m	-
KS/17/380*	GER	BW	zoo, pest animal	+	+	2012**	R. norvegicus	29	m	-
KS/17/381*	GER	BW	zoo, pest animal	+	+	2012**	R. norvegicus	39	m	-
KS/17/382*	GER	BW	zoo, pest animal	+	+	2009	R. norvegicus	54	f	-
KS/17/383*	GER	BW	zoo, pest animal	+	+	2012**	R. norvegicus	122	f	-
KS/17/384*	GER	BW	zoo, pest animal	+	+	2012**	R. norvegicus	51	m	-
KS/17/385*	GER	BW	zoo, pest animal	+	+	2009	R. norvegicus	23	m	-
KS/17/386*	GER	BW	zoo, pest animal	+	+	2012**	R. norvegicus	34	f	-
1 Probability of contact to humans or livestock, based on the location of capture: -, no contact; +, possible contact; ++, likely contact
2 Species definition was based on cytB sequencing
3 NRW_1 and NRW_2 represent two different rat cohorts from NRW. NRW_1 comprises rats from various settings (town, farm, meat processing), NRW_2 comprises only rats from livestock farms
* ref. [90]
**date of receipt at the Friedrich-Loeffler-Institute (FLI)
Abbreviations: BW, Baden-Württemberg; CZE, Czech Republic; f, female; g, gram; GER, Germany; m, male; MSR, Moravian-Silesian Region; MV, Mecklenburg Western Pomerania; NA, not available; ND, not determined; NRW, North Rhine-Westphalia

## Sheet: Tab_S3_methods_capt. wild + lab
Table S3: Description of the geographical origin, original habitat, housing conditions and hygiene measures in husbandries of captive wild rats (N=188) as well as laboratory rats (N=114) from Germany.
Category	State1	Location1	No.	S. aureus+	Description	Habitat2	Capture method	Housing conditions	Hygiene measures3	Contact4	Sacrifice	Holding / other permits
Captive wild rats	BB	Potsdam-Mittelmark district	72	14	rats from various animal breeding facilities7	variable; partly urban, partly livestock farms	unknown8	standard cages; contact within cages	open cages; standard personal protection measures incl. coats, gloves and face masks	contact to animal keepers	CO2 euthanasia	holding permit: Veterinary Office of the district of Potsdam-Mittelmark (23.06.2014)
	BE	Berlin5	33	25	Rattus rattus, captured in a pig farm in June 2015, since then in breeding	farm	live traps	large enclosure (ca. 80 animals)	standard personal protection measures incl. coats, gloves, shoes	only very limited contact to animal keepers	isoflurane	holding permit: State Office for Health and Social Issues, No. IC 114 -ZH25 (10.04.2014)
	BE	Berlin	2	2	Rattus norvegicus, captured in the city (pest control), since then in breeding	city	live traps	large enclosure (ca. 80 animals)	standard personal protection measures incl. coats, gloves, shoes	only very limited contact to animal keepers	isoflurane	holding permit: State Office for Health and Social Issues, No. IC 114 -ZH25 (10.04.2014)
	NRW	Münster	81	0	wild rats crossed with Sprague Dawley (Rattus norvegicus)	original wild rat parent from livestock farms	wild rats trapped with live traps	standard cages; contact within cages	open cages; standard personal protection measures incl. coats, gloves, face masks	only contact to animal keepers	CO2 euthanasia	holding permit: Health and Veterinary Office Münster, No. #39.32.7.1 (09.12.2013); animal ethics permit: North Rhine-Westphalia State Agency for Nature, Environment and Consumer Protection, No. 84-02.04.2013.A288 (29.11.2013)
Laboratory rats	BW	Stuttgart	20	0	Rattus norvegicus	feeder animal breeding	NA	standard cages; contact within cages	open cages; standard personal protection measures incl. gloves (no coats or face masks)	only contact to animal keepers	CO2 euthanasia	general zoo permit, No. DE 08 111 100115 (12.08.2011)
	HE	Kronberg im Taunus	40	7	frozen feeder rats from suppliers; feeder animal breeding	feeder animal breeding exclusively in the premises of the zoo	NA	standard cages; contact within cages	open cages; standard personal protection measures incl. gloves (no coats or face masks)	only contact to animal keepers	cervical dislocation	general zoo permit, Darmstadt Regional Council, No. V 51.1 – 1.1 – R 25.3 – ZRL – Kronberg, Opel-Zoo (19.4.2016)
	MV	Greifswald6	21	7	Rattus norvegicus	dedicated small rodent husbandry	NA	standard cages; contact within cages	open cages under SPF conditions9; standard personal protection measures incl. coats, gloves, face masks and head covers	only contact to animal keepers	CO2 euthanasia	holding permit: Veterinary and Food Inspection Office, district of Vorpommern-Greifswald, No. Dr.Caa.ZSF3936/11/17 (07.11.2017)
	NRW	Münster	33	0	Sprague Dawley (Rattus norvegicus)	NA	NA	standard cages; contact within cages	open cages; standard personal protection measures incl. coats, gloves, face masks	only contact to animal keepers	CO2 euthanasia	holding permit: Health and Veterinary Office Münster, No. #39.32.7.1 (09.12.2013); animal ethics permit: North Rhine-Westphalia State Agency for Nature, Environment and Consumer Protection, No. 84-02.04.2013.A288 (29.11.2013)
1 for captive wild rats the location of the husbandry rather than the capture location is reported
2 for captive wild rats the habitat of the captured ancestral rats is reported
3 open cages vs. individually ventilated cages (IVC), gowns, gloves, mouth protection
4 direct contact with other animals / humans
5 captured in Neufels, Baden-Württemberg
6 Central Core & Research Facility of Laboratory Animals (ZSFV, University Medicine Greifswald, Germany)
7 variable housing duration (years to decades)
8 received from other animal breeding facilities
9 autoclaved feed, acidified drinking water, sterilized equipment
Abbreviations: BB, Brandenburg; BE, Berlin; BW, Baden-Württemberg; HE, Hesse; MV, Mecklenburg Western Pomerania; NRW, North Rhine-Westphalia; NA, not applicable; No., number

## Sheet: Tab_S4_captive wild rats
Table S4: Overview of the captive wild rats included in this study, their origin, characteristics and nasal S. aureus colonization.
Strain ID	Country1	State1	Location1	Strain2	Sampling site	Type of infection	Probable contact to humans3	Probable contact to livestock3	Year	Species4	Weight (g)	Sex	S. aureus
KS/17/01	GER	BB	GBR	BSR	nose	col	++	-	2016	R. norvegicus	294	f	-
KS/17/02	GER	BB	GBR	BSR	nose	col	++	-	2016	R. norvegicus	302	f	-
KS/17/03	GER	BB	GBR	BSR	nose	col	++	-	2016	R. norvegicus	263	f	-
KS/17/04	GER	BB	GBR	BSR	nose	col	++	-	2016	R. norvegicus	272	f	-
KS/17/05	GER	BB	GBR	BSR	nose	col	++	-	2016	R. norvegicus	251	f	-
KS/17/06	GER	BB	GBR	BSR	nose	col	++	-	2016	R. norvegicus	326	m	-
KS/17/07	GER	BB	GBR	BSR	nose	col	++	-	2016	R. norvegicus	365	m	-
KS/17/08	GER	BB	GBR	BSR	nose	col	++	-	2016	R. norvegicus	376	m	-
KS/17/09	GER	BB	GBR	BSR	nose	col	++	-	2016	R. norvegicus	409	m	-
KS/17/10	GER	BB	GBR	BSR	nose	col	++	-	2016	R. norvegicus	382	m	-
KS/17/11	GER	BB	GBR	BSR	nose	col	++	-	2016	R. norvegicus	370	m	-
KS/17/12	GER	BB	Neufels, BW	Neufels	nose	col	++	+	2016	R. rattus	189	m	-
KS/17/13	GER	BB	Neufels, BW	Neufels	nose	col	++	+	2016	R. rattus	148	m	-
KS/17/14	GER	BB	Neufels, BW	Neufels	nose	col	++	+	2016	R. rattus	152	m	-
KS/17/15	GER	BB	Neufels, BW	Neufels	nose	col	++	+	2016	R. rattus	206	m	-
KS/17/16	GER	BB	Neufels, BW	Neufels	nose	col	++	+	2016	R. rattus	212	m	-
KS/17/17	GER	BB	Neufels, BW	Neufels	nose	col	++	+	2016	R. rattus	171	m	-
KS/17/18	GER	BB	Neufels, BW	Neufels	nose	col	++	+	2016	R. rattus	142	m	-
KS/17/19	GER	BB	Neufels, BW	Neufels	nose	col	++	+	2016	R. rattus	202	f	+
KS/17/20	GER	BB	Neufels, BW	Neufels	nose	col	++	+	2016	R. rattus	186	f	+
KS/17/21	GER	BB	Neufels, BW	Neufels	nose	col	++	+	2016	R. rattus	162	f	+
KS/17/22	GER	BB	Neufels, BW	Neufels	nose	col	++	+	2016	R. rattus	163	f	+
KS/17/23	GER	BB	FRA	Lyon	nose	col	++	-	2016	R. norvegicus	340	f	-
KS/17/24	GER	BB	FRA	Lyon	nose	col	++	-	2016	R. norvegicus	354	f	-
KS/17/25	GER	BB	FRA	Lyon	nose	col	++	-	2016	R. norvegicus	304	f	-
KS/17/26	GER	BB	FRA	Lyon	nose	col	++	-	2016	R. norvegicus	347	f	-
KS/17/27	GER	BB	FRA	Lyon	nose	col	++	-	2016	R. norvegicus	332	f	-
KS/17/28	GER	BB	FRA	Lyon	nose	col	++	-	2016	R. norvegicus	345	f	-
KS/17/29	GER	BB	GBR	Tilbury	nose	col	++	-	2016	R. rattus	124	m	-
KS/17/30	GER	BB	GBR	Tilbury	nose	col	++	-	2016	R. rattus	144	m	-
KS/17/31	GER	BB	GBR	Tilbury	nose	col	++	-	2016	R. rattus	109	m	+
KS/17/32	GER	BB	GBR	Tilbury	nose	col	++	-	2016	R. rattus	108	m	-
KS/17/33	GER	BB	GBR	Tilbury	nose	col	++	-	2016	R. rattus	112	m	-
KS/17/34	GER	BB	GBR	Tilbury	nose	col	++	-	2016	R. rattus	102	f	-
KS/17/35	GER	BB	GBR	Tilbury	nose	col	++	-	2016	R. rattus	124	m	-
KS/17/36	GER	BB	GBR	Tilbury	nose	col	++	-	2016	R. rattus	77	f	-
KS/17/37	GER	BB	GBR	Tilbury	nose	col	++	-	2016	R. rattus	125	f	+
KS/17/38	GER	BB	GBR	Tilbury	nose	col	++	-	2016	R. rattus	94	f	-
KS/17/39	GER	BB	GBR	Tilbury	nose	col	++	-	2016	R. rattus	99	f	-
KS/17/40	GER	BB	GBR	Tilbury	nose	col	++	-	2016	R. rattus	87	f	-
KS/17/41	GER	BB	GBR	Tilbury	nose	col	++	-	2016	R. rattus	143	f	+
KS/17/42	GER	BB	GBR	Tilbury	nose	col	++	-	2016	R. rattus	147	f	+
KS/17/43	GER	BB	GBR	Tilbury	nose	col	++	-	2016	R. rattus	110	f	+
KS/17/44	GER	BB	GBR	Tilbury	nose	col	++	-	2016	R. rattus	130	f	+
KS/17/45	GER	BB	GBR	Tilbury	nose	col	++	-	2016	R. rattus	156	f	+
KS/17/46	GER	BB	Neufels, BW	Neufels	nose	col	++	+	2016	R. rattus	182	f	+
KS/17/47	GER	BB	Neufels, BW	Neufels	nose	col	++	+	2016	R. rattus	91	m	+
KS/17/48	GER	BB	NA	WPHR	nose	col	++	-	2016	R. norvegicus	319	m	-
KS/17/49	GER	BB	NA	WPHR	nose	col	++	-	2016	R. norvegicus	276	m	-
KS/17/50	GER	BB	NA	WPHR	nose	col	++	-	2016	R. norvegicus	253	m	-
KS/17/51	GER	BB	NA	WPHR	nose	col	++	-	2016	R. norvegicus	278	m	-
KS/17/52	GER	BB	NA	WPHR	nose	col	++	-	2016	R. norvegicus	237	m	-
KS/17/53	GER	BB	NA	WPHR	nose	col	++	-	2016	R. norvegicus	201	f	-
KS/17/54	GER	BB	NA	WPHR	nose	col	++	-	2016	R. norvegicus	283	f	-
KS/17/55	GER	BB	NA	WPHR	nose	col	++	-	2016	R. norvegicus	249	f	-
KS/17/56	GER	BB	NA	WPHR	nose	col	++	-	2016	R. norvegicus	208	f	-
KS/17/57	GER	BB	NA	WPHR	nose	col	++	-	2016	R. norvegicus	245	f	-
KS/17/58	GER	BB	GBR	Tilbury	nose	col	++	-	2016	R. rattus	143	f	-
KS/17/59	GER	BB	GBR	Tilbury	nose	col	++	-	2016	R. rattus	109	m	-
KS/17/60	GER	BB	GBR	Tilbury	nose	col	++	-	2016	R. rattus	98	f	-
KS/17/61	GER	BB	GER (cities and farms)	MHS	nose	col	++	-	2016	R. norvegicus	291	f	-
KS/17/62	GER	BB	GER (cities and farms)	MHS	nose	col	++	-	2016	R. norvegicus	264	f	-
KS/17/63	GER	BB	GER (cities and farms)	MHS	nose	col	++	-	2016	R. norvegicus	295	f	-
KS/17/64	GER	BB	GER (cities and farms)	MHS	nose	col	++	-	2016	R. norvegicus	264	f	-
KS/17/65	GER	BB	GER (cities and farms)	MHS	nose	col	++	-	2016	R. norvegicus	303	f	-
KS/17/66	GER	BB	GER (cities and farms)	MHS	nose	col	++	-	2016	R. norvegicus	412	m	-
KS/17/67	GER	BB	GER (cities and farms)	MHS	nose	col	++	-	2016	R. norvegicus	380	m	+
KS/17/68	GER	BB	GER (cities and farms)	MHS	nose	col	++	-	2016	R. norvegicus	407	m	-
KS/17/69	GER	BB	GER (cities and farms)	MHS	nose	col	++	-	2016	R. norvegicus	428	m	-
KS/17/70	GER	BB	GER (cities and farms)	MHS	nose	col	++	-	2016	R. norvegicus	414	m	-
KS/17/71	GER	BB	GBR	BSR	nose	col	++	-	2016	R. norvegicus	462	m	-
KS/17/72	GER	BB	GBR	BSR	nose	col	++	-	2016	R. norvegicus	447	m	-
KS/17/387	GER	BE	Neufels, BW	Neufels	nose	col	++	+	2017	R. rattus	222	m	-
KS/17/388	GER	BE	Neufels, BW	Neufels	nose	col	++	+	2017	R. rattus	249	m	-
KS/17/389	GER	BE	Neufels, BW	Neufels	nose	col	++	+	2017	R. rattus	258	m	+
KS/17/390	GER	BE	Neufels, BW	Neufels	nose	col	++	+	2017	R. rattus	202	m	+
KS/17/391	GER	BE	Neufels, BW	Neufels	nose	col	++	+	2017	R. rattus	239	m	+
KS/17/392	GER	BE	Neufels, BW	Neufels	nose	col	++	+	2017	R. rattus	202	m	+
KS/17/393	GER	BE	Neufels, BW	Neufels	nose	col	++	+	2017	R. rattus	293	f	+
KS/17/394	GER	BE	Neufels, BW	Neufels	nose	col	++	+	2017	R. rattus	226	m	+
KS/17/395	GER	BE	Neufels, BW	Neufels	nose	col	++	+	2017	R. rattus	257	f	+
KS/17/396	GER	BE	Neufels, BW	Neufels	nose	col	++	+	2017	R. rattus	232	m	+
KS/17/397	GER	BE	Neufels, BW	Neufels	nose	col	++	+	2017	R. rattus	193	m	+
KS/17/398	GER	BE	Neufels, BW	Neufels	nose	col	++	+	2017	R. rattus	197	m	-
KS/17/399	GER	BE	Neufels, BW	Neufels	nose	col	++	+	2017	R. rattus	267	m	+
KS/17/400	GER	BE	Neufels, BW	Neufels	nose	col	++	+	2017	R. rattus	245	f	-
KS/17/401	GER	BE	Neufels, BW	Neufels	nose	col	++	+	2017	R. rattus	127	f	+
KS/17/402	GER	BE	Neufels, BW	Neufels	nose	col	++	+	2017	R. rattus	254	m	+
KS/17/403	GER	BE	Neufels, BW	Neufels	nose	col	++	+	2017	R. rattus	217	m	+
KS/17/404	GER	BE	Neufels, BW	Neufels	nose	col	++	+	2017	R. rattus	205	f	-
KS/17/405	GER	BE	Neufels, BW	Neufels	nose	col	++	+	2017	R. rattus	271	m	+
KS/17/406	GER	BE	Neufels, BW	Neufels	nose	col	++	+	2017	R. rattus	259	f	+
KS/17/407	GER	BE	Neufels, BW	Neufels	nose	col	++	+	2017	R. rattus	232	m	+
KS/17/408	GER	BE	Neufels, BW	Neufels	nose	col	++	+	2017	R. rattus	178	f	-
KS/17/409	GER	BE	Neufels, BW	Neufels	nose	col	++	+	2017	R. rattus	233	f	+
KS/17/410	GER	BE	Neufels, BW	Neufels	nose	col	++	+	2017	R. rattus	215	m	+
KS/17/411	GER	BE	Neufels, BW	Neufels	nose	col	++	+	2017	R. rattus	228	m	+
KS/17/412	GER	BE	Neufels, BW	Neufels	nose	col	++	+	2017	R. rattus	223	m	-
KS/17/413	GER	BE	Neufels, BW	Neufels	nose	col	++	+	2017	R. rattus	222	f	+
KS/17/414	GER	BE	Neufels, BW	Neufels	nose	col	++	+	2017	R. rattus	223	m	+
KS/17/415	GER	BE	Neufels, BW	Neufels	nose	col	++	+	2017	R. rattus	255	m	+
KS/17/416	GER	BE	Berlin	NA	nose	col	++	-	2017	R. norvegicus	209	m	+
KS/17/417	GER	BE	Neufels, BW	Neufels	nose	col	++	+	2017	R. rattus	201	f	-
KS/17/418	GER	BE	Neufels, BW	Neufels	nose	col	++	+	2017	R. rattus	239	f	+
KS/17/419	GER	BE	Neufels, BW	Neufels	nose	col	++	+	2017	R. rattus	147	m	+
KS/17/420	GER	BE	Neufels, BW	Neufels	nose	col	++	+	2017	R. rattus	216	m	+
KS/17/421	GER	BE	Berlin	NA	nose	col	++	-	2017	R. norvegicus	255	f	+
KS/18/433	GER	NRW	FRA	Lyon	nose	col	++	-	2018	R. norvegicus	370	m	-
KS/18/434	GER	NRW	FRA	Lyon	nose	col	++	-	2018	R. norvegicus	340	m	-
KS/18/435	GER	NRW	FRA	Lyon	nose	col	++	-	2018	R. norvegicus	340	m	-
KS/18/436	GER	NRW	FRA	Lyon	nose	col	++	-	2018	R. norvegicus	320	m	-
KS/18/437	GER	NRW	FRA	Lyon	nose	col	++	-	2018	R. norvegicus	240	f	-
KS/18/438	GER	NRW	FRA	Lyon	nose	col	++	-	2018	R. norvegicus	230	f	-
KS/18/439	GER	NRW	FRA	Lyon	nose	col	++	-	2018	R. norvegicus	200	f	-
KS/18/440	GER	NRW	FRA	Lyon	nose	col	++	-	2018	R. norvegicus	310	f	-
KS/18/441	GER	NRW	FRA	Lyon	nose	col	++	-	2018	R. norvegicus	220	f	-
KS/18/442	GER	NRW	FRA	Lyon	nose	col	++	-	2018	R. norvegicus	200	f	-
KS/18/443	GER	NRW	FRA	Lyon	nose	col	++	-	2018	R. norvegicus	180	f	-
KS/18/444	GER	NRW	FRA	Lyon	nose	col	++	-	2018	R. norvegicus	280	m	-
KS/18/445	GER	NRW	FRA	Lyon	nose	col	++	-	2018	R. norvegicus	250	m	-
KS/18/446	GER	NRW	FRA	Lyon	nose	col	++	-	2018	R. norvegicus	270	m	-
KS/18/447	GER	NRW	FRA	Lyon	nose	col	++	-	2018	R. norvegicus	240	m	-
KS/18/448	GER	NRW	FRA	Lyon	nose	col	++	-	2018	R. norvegicus	320	m	-
KS/18/449	GER	NRW	FRA	Lyon	nose	col	++	-	2018	R. norvegicus	190	f	-
KS/18/450	GER	NRW	FRA	Lyon	nose	col	++	-	2018	R. norvegicus	210	f	-
KS/18/451	GER	NRW	FRA	Lyon	nose	col	++	-	2018	R. norvegicus	310	f	-
KS/18/452	GER	NRW	FRA	Lyon	nose	col	++	-	2018	R. norvegicus	200	f	-
KS/18/453	GER	NRW	FRA	Lyon	nose	col	++	-	2018	R. norvegicus	190	f	-
KS/18/454	GER	NRW	FRA	Lyon	nose	col	++	-	2018	R. norvegicus	230	f	-
KS/18/455	GER	NRW	FRA	Lyon	nose	col	++	-	2018	R. norvegicus	230	f	-
KS/18/456	GER	NRW	FRA	Lyon	nose	col	++	-	2018	R. norvegicus	210	f	-
KS/18/457	GER	NRW	FRA	Lyon	nose	col	++	-	2018	R. norvegicus	220	f	-
KS/18/458	GER	NRW	FRA	Lyon	nose	col	++	-	2018	R. norvegicus	220	f	-
KS/18/483	GER	NRW	FRA	Lyon	nose	col	++	-	2018	R. norvegicus	150	m	-
KS/18/484	GER	NRW	FRA	Lyon	nose	col	++	-	2018	R. norvegicus	180	m	-
KS/18/485	GER	NRW	FRA	Lyon	nose	col	++	-	2018	R. norvegicus	120	f	-
KS/18/486	GER	NRW	FRA	Lyon	nose	col	++	-	2018	R. norvegicus	130	f	-
KS/18/487	GER	NRW	FRA	Lyon	nose	col	++	-	2018	R. norvegicus	120	m	-
KS/18/488	GER	NRW	FRA	Lyon	nose	col	++	-	2018	R. norvegicus	50	f	-
KS/18/489	GER	NRW	FRA	Lyon	nose	col	++	-	2018	R. norvegicus	140	f	-
KS/18/490	GER	NRW	FRA	Lyon	nose	col	++	-	2018	R. norvegicus	140	m	-
KS/18/491	GER	NRW	FRA	Lyon	nose	col	++	-	2018	R. norvegicus	140	m	-
KS/18/492	GER	NRW	FRA	Lyon	nose	col	++	-	2018	R. norvegicus	150	m	-
KS/18/493	GER	NRW	FRA	Lyon	nose	col	++	-	2018	R. norvegicus	160	m	-
KS/18/494	GER	NRW	FRA	Lyon	nose	col	++	-	2018	R. norvegicus	140	f	-
KS/18/495	GER	NRW	FRA	Lyon	nose	col	++	-	2018	R. norvegicus	150	f	-
KS/18/496	GER	NRW	FRA	Lyon	nose	col	++	-	2018	R. norvegicus	120	f	-
KS/18/497	GER	NRW	FRA	Lyon	nose	col	++	-	2018	R. norvegicus	140	f	-
KS/18/498	GER	NRW	FRA	Lyon	nose	col	++	-	2018	R. norvegicus	130	f	-
KS/18/499	GER	NRW	FRA	Lyon	nose	col	++	-	2018	R. norvegicus	140	f	-
KS/18/500	GER	NRW	FRA	Lyon	nose	col	++	-	2018	R. norvegicus	170	m	-
KS/18/501	GER	NRW	FRA	Lyon	nose	col	++	-	2018	R. norvegicus	160	m	-
KS/18/502	GER	NRW	FRA	Lyon	nose	col	++	-	2018	R. norvegicus	130	f	-
KS/18/503	GER	NRW	FRA	Lyon	nose	col	++	-	2018	R. norvegicus	120	f	-
KS/18/504	GER	NRW	FRA	Lyon	nose	col	++	-	2018	R. norvegicus	160	f	-
KS/18/505	GER	NRW	FRA	Lyon	nose	col	++	-	2018	R. norvegicus	130	f	-
KS/18/506	GER	NRW	FRA	Lyon	nose	col	++	-	2018	R. norvegicus	150	m	-
KS/18/507	GER	NRW	FRA	Lyon	nose	col	++	-	2018	R. norvegicus	140	f	-
KS/18/508	GER	NRW	FRA	Lyon	nose	col	++	-	2018	R. norvegicus	150	m	-
KS/18/509	GER	NRW	FRA	Lyon	nose	col	++	-	2018	R. norvegicus	150	m	-
KS/18/510	GER	NRW	FRA	Lyon	nose	col	++	-	2018	R. norvegicus	140	m	-
KS/18/1319	GER	NRW	NA	WPHR	nose	col	++	-	2018	R. norvegicus	129	f	-
KS/18/1320	GER	NRW	NA	WPHR	nose	col	++	-	2018	R. norvegicus	153	m	-
KS/18/1321	GER	NRW	NA	WPHR	nose	col	++	-	2018	R. norvegicus	143	f	-
KS/18/1322	GER	NRW	NA	WPHR	nose	col	++	-	2018	R. norvegicus	156	m	-
KS/18/1323	GER	NRW	NA	WPHR	nose	col	++	-	2018	R. norvegicus	134	f	-
KS/18/1324	GER	NRW	NA	WPHR	nose	col	++	-	2018	R. norvegicus	153	m	-
KS/18/1325	GER	NRW	NA	WPHR	nose	col	++	-	2018	R. norvegicus	140	f	-
KS/18/1326	GER	NRW	NA	WPHR	nose	col	++	-	2018	R. norvegicus	140	f	-
KS/18/1327	GER	NRW	NA	WPHR	nose	col	++	-	2018	R. norvegicus	110	m	-
KS/18/1328	GER	NRW	NA	WPHR	nose	col	++	-	2018	R. norvegicus	106	m	-
KS/18/1329	GER	NRW	NA	WPHR	nose	col	++	-	2018	R. norvegicus	108	m	-
KS/18/1330	GER	NRW	NA	WPHR	nose	col	++	-	2018	R. norvegicus	120	m	-
KS/18/1331	GER	NRW	NA	WPHR	nose	col	++	-	2018	R. norvegicus	144	f	-
KS/18/1332	GER	NRW	NA	WPHR	nose	col	++	-	2018	R. norvegicus	147	f	-
KS/18/1333	GER	NRW	NA	WPHR	nose	col	++	-	2018	R. norvegicus	138	f	-
KS/18/1334	GER	NRW	NA	WPHR	nose	col	++	-	2018	R. norvegicus	140	f	-
KS/18/1335	GER	NRW	NA	WPHR	nose	col	++	-	2018	R. norvegicus	170	m	-
KS/18/1336	GER	NRW	NA	WPHR	nose	col	++	-	2018	R. norvegicus	162	m	-
KS/18/1337	GER	NRW	NA	WPHR	nose	col	++	-	2018	R. norvegicus	138	f	-
KS/18/1338	GER	NRW	NA	WPHR	nose	col	++	-	2018	R. norvegicus	150	m	-
KS/18/1339	GER	NRW	NA	WPHR	nose	col	++	-	2018	R. norvegicus	124	f	-
KS/18/1340	GER	NRW	NA	WPHR	nose	col	++	-	2018	R. norvegicus	131	f	-
KS/18/1341	GER	NRW	NA	WPHR	nose	col	++	-	2018	R. norvegicus	140	f	-
KS/18/1342	GER	NRW	NA	WPHR	nose	col	++	-	2018	R. norvegicus	139	m	-
KS/18/1343	GER	NRW	NA	WPHR	nose	col	++	-	2018	R. norvegicus	121	m	-
KS/18/1344	GER	NRW	NA	WPHR	nose	col	++	-	2018	R. norvegicus	118	f	-
KS/18/1345	GER	NRW	NA	WPHR	nose	col	++	-	2018	R. norvegicus	112	f	-
1 for captive wild rats, "state" refers to the husbandry, while "location" refers to capture location of ancestral rats
2 BSR: original strain obtained in August 2015 from GBR, and then crossed with a lab strain; Lyon: original strain from FRA (Y139F) crossed with Sprague Dawley; MHS: crossing of several strains from German cities and farms; Neufels: strain captured in a pig farm in Neufels (BW) in June 2015, since then in breeding; Tilbury: original strain obtained in August 2015 from GBR (strain captured in the …
3 Probability of contact to humans or livestock, based on the location of capture: -, no contact; +, possible contact; ++, likely contact
4 Species definition was based on cytB sequencing
Abbreviations: BB, Brandenburg; BE, Berlin; BW, Baden-Württemberg; col, colonization; CZE, Czech Republic; f, female; FRA, France; g, gram; GBR, Great Britain; GER, Germany; m, male; NA, not available; NRW, North Rhine-Westphalia; UBA: Umweltbundesamt Berlin

## Sheet: Tab_S5_lab rat
Table S5: Overview of the laboratory rats included in this study, their origin, characteristics and nasal S. aureus colonization.
Strain ID	Country	State	Location	Strain	Sampling site	Type of infection	Probable contact to humans1	Probable contact to livestock1	Year	Species2	Weight (g)	Sex	S. aureus
KS/17/147	GER	BW	Stuttgart	NA (feeder rats)	nose	col	++	-	2017	R. norvegicus	274	f	-
KS/17/148	GER	BW	Stuttgart	NA (feeder rats)	nose	col	++	-	2017	R. norvegicus	309	f	-
KS/17/149	GER	BW	Stuttgart	NA (feeder rats)	nose	col	++	-	2017	R. norvegicus	365	m	-
KS/17/150	GER	BW	Stuttgart	NA (feeder rats)	nose	col	++	-	2017	R. norvegicus	331	m	-
KS/17/151	GER	BW	Stuttgart	NA (feeder rats)	nose	col	++	-	2017	R. norvegicus	385	f	-
KS/17/152	GER	BW	Stuttgart	NA (feeder rats)	nose	col	++	-	2017	R. norvegicus	376	m	-
KS/17/153	GER	BW	Stuttgart	NA (feeder rats)	nose	col	++	-	2017	R. norvegicus	96	m	-
KS/17/154	GER	BW	Stuttgart	NA (feeder rats)	nose	col	++	-	2017	R. norvegicus	423	m	-
KS/17/155	GER	BW	Stuttgart	NA (feeder rats)	nose	col	++	-	2017	R. norvegicus	274	f	-
KS/17/156	GER	BW	Stuttgart	NA (feeder rats)	nose	col	++	-	2017	R. norvegicus	305	f	-
KS/17/157	GER	BW	Stuttgart	NA (feeder rats)	nose	col	++	-	2017	R. norvegicus	178	m	-
KS/17/158	GER	BW	Stuttgart	NA (feeder rats)	nose	col	++	-	2017	R. norvegicus	164	m	-
KS/17/159	GER	BW	Stuttgart	NA (feeder rats)	nose	col	++	-	2017	R. norvegicus	160	m	-
KS/17/160	GER	BW	Stuttgart	NA (feeder rats)	nose	col	++	-	2017	R. norvegicus	149	m	-
KS/17/161	GER	BW	Stuttgart	NA (feeder rats)	nose	col	++	-	2017	R. norvegicus	216	m	-
KS/17/162	GER	BW	Stuttgart	NA (feeder rats)	nose	col	++	-	2017	R. norvegicus	313	f	-
KS/17/163	GER	BW	Stuttgart	NA (feeder rats)	nose	col	++	-	2017	R. norvegicus	151	m	-
KS/17/164	GER	BW	Stuttgart	NA (feeder rats)	nose	col	++	-	2017	R. norvegicus	399	m	-
KS/17/165	GER	BW	Stuttgart	NA (feeder rats)	nose	col	++	-	2017	R. norvegicus	301	f	-
KS/17/166	GER	BW	Stuttgart	NA (feeder rats)	nose	col	++	-	2017	R. norvegicus	262	f	-
KS/18/206	GER	MV	Greifswald ZSFV	LEWIS	nose	col	++	-	2017	R. norvegicus	286.5	f	-
KS/18/207	GER	MV	Greifswald ZSFV	LEW background	nose	col	++	-	2017	R. norvegicus	460.7	m	-
KS/18/208	GER	MV	Greifswald ZSFV	LEWIS	nose	col	++	-	2017	R. norvegicus	404.7	m	-
KS/18/209	GER	MV	Greifswald ZSFV	CD background	nose	col	++	-	2017	R. norvegicus	374.3	f	-
KS/18/210	GER	MV	Greifswald ZSFV	LEWIS	nose	col	++	-	2017	R. norvegicus	441.7	m	-
KS/18/211	GER	MV	Greifswald ZSFV	CD background	nose	col	++	-	2017	R. norvegicus	311.9	f	-
KS/18/212	GER	MV	Greifswald ZSFV	LEWIS	nose	col	++	-	2017	R. norvegicus	437.8	m	-
KS/18/213	GER	MV	Greifswald ZSFV	LEWIS	nose	col	++	-	2017	R. norvegicus	243.4	f	-
KS/18/214	GER	MV	Greifswald ZSFV	LEW background	nose	col	++	-	2017	R. norvegicus	226.7	f	+
KS/18/215	GER	MV	Greifswald ZSFV	LEW background	nose	col	++	-	2017	R. norvegicus	464.2	m	-
KS/18/216	GER	MV	Greifswald ZSFV	LEWIS	nose	col	++	-	2017	R. norvegicus	282.9	f	-
KS/18/217	GER	MV	Greifswald ZSFV	LEW background	nose	col	++	-	2017	R. norvegicus	297.7	f	-
KS/18/218	GER	MV	Greifswald ZSFV	CD background	nose	col	++	-	2017	R. norvegicus	576.1	m	-
KS/18/219	GER	MV	Greifswald ZSFV	CD background	nose	col	++	-	2017	R. norvegicus	413.7	m	-
KS/18/220	GER	MV	Greifswald ZSFV	CD background	nose	col	++	-	2017	R. norvegicus	397.1	f	+
KS/18/221	GER	MV	Greifswald ZSFV	LEW background	nose	col	++	-	2017	R. norvegicus	460.7	m	-
KS/18/222	GER	MV	Greifswald ZSFV	CD background	nose	col	++	-	2017	R. norvegicus	575.9	m	+
KS/18/223	GER	MV	Greifswald ZSFV	LEWIS	nose	col	++	-	2017	R. norvegicus	304.6	f	+
KS/18/224	GER	MV	Greifswald ZSFV	LEWIS	nose	col	++	-	2017	R. norvegicus	393.6	m	+
KS/18/225	GER	MV	Greifswald ZSFV	CD background	nose	col	++	-	2017	R. norvegicus	255.9	f	+
KS/18/226	GER	MV	Greifswald ZSFV	LEW background	nose	col	++	-	2017	R. norvegicus	312	f	+
KS/18/1214	GER	HE	Kronberg im Taunus (zoo)	NA (feeder rats)	nose	col	++	-	2018	R. norvegicus	421.9	m	+
KS/18/1215	GER	HE	Kronberg im Taunus (zoo)	NA (feeder rats)	nose	col	++	-	2018	R. norvegicus	375	m	-
KS/18/1216	GER	HE	Kronberg im Taunus (zoo)	NA (feeder rats)	nose	col	++	-	2018	R. norvegicus	134	f	+
KS/18/1217	GER	HE	Kronberg im Taunus (zoo)	NA (feeder rats)	nose	col	++	-	2018	R. norvegicus	50	m	-
KS/18/1218	GER	HE	Kronberg im Taunus (zoo)	NA (feeder rats)	nose	col	++	-	2018	R. norvegicus	59.4	f	-
KS/18/1219	GER	HE	Kronberg im Taunus (zoo)	NA (feeder rats)	nose	col	++	-	2018	R. norvegicus	465	m	+
KS/18/1220	GER	HE	Kronberg im Taunus (zoo)	NA (feeder rats)	nose	col	++	-	2018	R. norvegicus	438.9	m	+
KS/18/1221	GER	HE	Kronberg im Taunus (zoo)	NA (feeder rats)	nose	col	++	-	2018	R. norvegicus	438.6	m	-
KS/18/1222	GER	HE	Kronberg im Taunus (zoo)	NA (feeder rats)	nose	col	++	-	2018	R. norvegicus	445.6	m	-
KS/18/1223	GER	HE	Kronberg im Taunus (zoo)	NA (feeder rats)	nose	col	++	-	2018	R. norvegicus	354.7	f	+
KS/18/1224	GER	HE	Kronberg im Taunus (zoo)	NA (feeder rats)	nose	col	++	-	2018	R. norvegicus	375.8	m	+
KS/18/1225	GER	HE	Kronberg im Taunus (zoo)	NA (feeder rats)	nose	col	++	-	2018	R. norvegicus	150	f	-
KS/18/1226	GER	HE	Kronberg im Taunus (zoo)	NA (feeder rats)	nose	col	++	-	2018	R. norvegicus	410.1	f	+
KS/18/1227	GER	HE	Kronberg im Taunus (zoo)	NA (feeder rats)	nose	col	++	-	2018	R. norvegicus	411.3	m	-
KS/18/1228	GER	HE	Kronberg im Taunus (zoo)	NA (feeder rats)	nose	col	++	-	2018	R. norvegicus	138	f	-
KS/18/1229	GER	HE	Kronberg im Taunus (zoo)	NA (feeder rats)	nose	col	++	-	2018	R. norvegicus	129.6	m	-
KS/18/1230	GER	HE	Kronberg im Taunus (zoo)	NA (feeder rats)	nose	col	++	-	2018	R. norvegicus	90.6	f	-
KS/18/1231	GER	HE	Kronberg im Taunus (zoo)	NA (feeder rats)	nose	col	++	-	2018	R. norvegicus	40.9	m	-
KS/18/1232	GER	HE	Kronberg im Taunus (zoo)	NA (feeder rats)	nose	col	++	-	2018	R. norvegicus	59.8	m	-
KS/18/1233	GER	HE	Kronberg im Taunus (zoo)	NA (feeder rats)	nose	col	++	-	2018	R. norvegicus	65.9	f	-
KS/18/1234	GER	HE	Kronberg im Taunus (zoo)	NA (feeder rats)	nose	col	++	-	2018	R. norvegicus	48.1	m	-
KS/18/1235	GER	HE	Kronberg im Taunus (zoo)	NA (feeder rats)	nose	col	++	-	2018	R. norvegicus	45.9	f	-
KS/18/1236	GER	HE	Kronberg im Taunus (zoo)	NA (feeder rats)	nose	col	++	-	2018	R. norvegicus	107.4	f	-
KS/18/1237	GER	HE	Kronberg im Taunus (zoo)	NA (feeder rats)	nose	col	++	-	2018	R. norvegicus	47.5	m	-
KS/18/1238	GER	HE	Kronberg im Taunus (zoo)	NA (feeder rats)	nose	col	++	-	2018	R. norvegicus	165.1	f	-
KS/18/1239	GER	HE	Kronberg im Taunus (zoo)	NA (feeder rats)	nose	col	++	-	2018	R. norvegicus	157.5	f	-
KS/18/1240	GER	HE	Kronberg im Taunus (zoo)	NA (feeder rats)	nose	col	++	-	2018	R. norvegicus	65.3	f	-
KS/18/1241	GER	HE	Kronberg im Taunus (zoo)	NA (feeder rats)	nose	col	++	-	2018	R. norvegicus	153.8	f	-
KS/18/1242	GER	HE	Kronberg im Taunus (zoo)	NA (feeder rats)	nose	col	++	-	2018	R. norvegicus	60.6	m	-
KS/18/1243	GER	HE	Kronberg im Taunus (zoo)	NA (feeder rats)	nose	col	++	-	2018	R. norvegicus	97.8	f	-
KS/18/1244	GER	HE	Kronberg im Taunus (zoo)	NA (feeder rats)	nose	col	++	-	2018	R. norvegicus	38.9	m	-
KS/18/1245	GER	HE	Kronberg im Taunus (zoo)	NA (feeder rats)	nose	col	++	-	2018	R. norvegicus	51.4	m	-
KS/18/1246	GER	HE	Kronberg im Taunus (zoo)	NA (feeder rats)	nose	col	++	-	2018	R. norvegicus	54.7	m	-
KS/18/1247	GER	HE	Kronberg im Taunus (zoo)	NA (feeder rats)	nose	col	++	-	2018	R. norvegicus	65	m	-
KS/18/1248	GER	HE	Kronberg im Taunus (zoo)	NA (feeder rats)	nose	col	++	-	2018	R. norvegicus	37.9	m	-
KS/18/1249	GER	HE	Kronberg im Taunus (zoo)	NA (feeder rats)	nose	col	++	-	2018	R. norvegicus	52.3	f	-
KS/18/1250	GER	HE	Kronberg im Taunus (zoo)	NA (feeder rats)	nose	col	++	-	2018	R. norvegicus	49.5	m	-
KS/18/1251	GER	HE	Kronberg im Taunus (zoo)	NA (feeder rats)	nose	col	++	-	2018	R. norvegicus	60.9	f	-
KS/18/1252	GER	HE	Kronberg im Taunus (zoo)	NA (feeder rats)	nose	col	++	-	2018	R. norvegicus	45.8	f	-
KS/18/1253	GER	HE	Kronberg im Taunus (zoo)	NA (feeder rats)	nose	col	++	-	2018	R. norvegicus	50.1	m	-
KS/18/511	GER	NRW	Münster	Sprague Dawley	nose	col	++	-	2018	R. norvegicus	160	f	-
KS/18/512	GER	NRW	Münster	Sprague Dawley	nose	col	++	-	2018	R. norvegicus	150	f	-
KS/18/513	GER	NRW	Münster	Sprague Dawley	nose	col	++	-	2018	R. norvegicus	180	m	-
KS/18/514	GER	NRW	Münster	Sprague Dawley	nose	col	++	-	2018	R. norvegicus	190	m	-
KS/18/515	GER	NRW	Münster	Sprague Dawley	nose	col	++	-	2018	R. norvegicus	160	f	-
KS/18/516	GER	NRW	Münster	Sprague Dawley	nose	col	++	-	2018	R. norvegicus	180	m	-
KS/18/517	GER	NRW	Münster	Sprague Dawley	nose	col	++	-	2018	R. norvegicus	150	f	-
KS/18/518	GER	NRW	Münster	Sprague Dawley	nose	col	++	-	2018	R. norvegicus	140	f	-
KS/18/519	GER	NRW	Münster	Sprague Dawley	nose	col	++	-	2018	R. norvegicus	130	f	-
KS/18/520	GER	NRW	Münster	Sprague Dawley	nose	col	++	-	2018	R. norvegicus	150	f	-
KS/18/521	GER	NRW	Münster	Sprague Dawley	nose	col	++	-	2018	R. norvegicus	190	m	-
KS/18/522	GER	NRW	Münster	Sprague Dawley	nose	col	++	-	2018	R. norvegicus	190	m	-
KS/18/523	GER	NRW	Münster	Sprague Dawley	nose	col	++	-	2018	R. norvegicus	210	m	-
KS/18/524	GER	NRW	Münster	Sprague Dawley	nose	col	++	-	2018	R. norvegicus	150	f	-
KS/18/525	GER	NRW	Münster	Sprague Dawley	nose	col	++	-	2018	R. norvegicus	170	f	-
KS/18/526	GER	NRW	Münster	Sprague Dawley	nose	col	++	-	2018	R. norvegicus	140	m	-
KS/18/527	GER	NRW	Münster	Sprague Dawley	nose	col	++	-	2018	R. norvegicus	130	f	-
KS/18/528	GER	NRW	Münster	Sprague Dawley	nose	col	++	-	2018	R. norvegicus	170	m	-
KS/18/529	GER	NRW	Münster	Sprague Dawley	nose	col	++	-	2018	R. norvegicus	170	m	-
KS/18/530	GER	NRW	Münster	Sprague Dawley	nose	col	++	-	2018	R. norvegicus	140	f	-
KS/18/531	GER	NRW	Münster	Sprague Dawley	nose	col	++	-	2018	R. norvegicus	150	m	-
KS/18/532	GER	NRW	Münster	Sprague Dawley	nose	col	++	-	2018	R. norvegicus	90	f	-
KS/18/533	GER	NRW	Münster	Sprague Dawley	nose	col	++	-	2018	R. norvegicus	180	m	-
KS/18/534	GER	NRW	Münster	Sprague Dawley	nose	col	++	-	2018	R. norvegicus	140	f	-
KS/18/535	GER	NRW	Münster	Sprague Dawley	nose	col	++	-	2018	R. norvegicus	170	m	-
KS/18/536	GER	NRW	Münster	Sprague Dawley	nose	col	++	-	2018	R. norvegicus	170	m	-
KS/18/537	GER	NRW	Münster	Sprague Dawley	nose	col	++	-	2018	R. norvegicus	160	m	-
KS/18/538	GER	NRW	Münster	Sprague Dawley	nose	col	++	-	2018	R. norvegicus	140	f	-
KS/18/539	GER	NRW	Münster	Sprague Dawley	nose	col	++	-	2018	R. norvegicus	140	f	-
KS/18/540	GER	NRW	Münster	Sprague Dawley	nose	col	++	-	2018	R. norvegicus	130	f	-
KS/18/541	GER	NRW	Münster	Sprague Dawley	nose	col	++	-	2018	R. norvegicus	160	m	-
KS/18/542	GER	NRW	Münster	Sprague Dawley	nose	col	++	-	2018	R. norvegicus	140	m	-
KS/18/543	GER	NRW	Münster	Sprague Dawley	nose	col	++	-	2018	R. norvegicus	120	f	-
CR001	USA	USA	CR	Outbred	nose	col	++	-	2011	R. norvegicus	NA	ND	+
CR008	USA	USA	CR	Outbred	nose	col	++	-	2011	R. norvegicus	NA	ND	+
CR012	USA	USA	CR	other	nose	col	++	-	2010	R. norvegicus	NA	ND	+
CR020	USA	USA	CR	Sprague Dawley	nose	col	++	-	2011	R. norvegicus	NA	ND	+
CR024	USA	USA	CR	other	nose	col	++	-	2011	R. norvegicus	NA	ND	+
CR027	USA	USA	CR	CD	nose	col	++	-	2011	R. norvegicus	NA	ND	+
CR028	JPN	JPN	CR	CD	nose	col	++	-	2011	R. norvegicus	NA	ND	+
CR031	CAN	CAN	CR	CD	nose	col	++	-	2011	R. norvegicus	NA	ND	+
CR032	JPN	JPN	CR	CD	nose	col	++	-	2011	R. norvegicus	NA	ND	+
CR033	USA	USA	CR	CD	nose	col	++	-	2011	R. norvegicus	NA	ND	+
CR037	JPN	JPN	CR	other	nose	col	++	-	2011	R. norvegicus	NA	ND	+
CR038	USA	USA	CR	CD	nose	col	++	-	2011	R. norvegicus	NA	ND	+
CR041	USA	USA	CR	CD	nose	col	++	-	2011	R. norvegicus	NA	ND	+
CR042	JPN	JPN	CR	other	nose	col	++	-	2011	R. norvegicus	NA	ND	+
CR043	JPN	JPN	CR	CD	nose	col	++	-	2011	R. norvegicus	NA	ND	+
CR048	USA	USA	CR	CD	nose	col	++	-	2011	R. norvegicus	NA	ND	+
CR067	USA	USA	CR	Sprague Dawley	nose	col	++	-	2011	R. norvegicus	NA	ND	+
CR068	USA	USA	CR	Wistar	nose	col	++	-	2011	R. norvegicus	NA	ND	+
CR071	USA	USA	CR	Outbred	nose	col	++	-	2011	R. norvegicus	NA	ND	+
CR076	USA	USA	CR	CD	nose	col	++	-	2011	R. norvegicus	NA	ND	+
CR078	USA	USA	CR	CD	nose	col	++	-	2011	R. norvegicus	NA	ND	+
CR080	USA	USA	CR	Outbred	nose	col	++	-	2011	R. norvegicus	NA	ND	+
CR086	USA	USA	CR	Sprague Dawley	nose	col	++	-	2011	R. norvegicus	NA	ND	+
CR089	USA	USA	CR	Wistar	nose	col	++	-	2011	R. norvegicus	NA	ND	+
CR090	USA	USA	CR	Outbred	nose	col	++	-	2011	R. norvegicus	NA	ND	+
CR095	USA	USA	CR	CD	nose	other	++	-	2011	R. norvegicus	NA	ND	+
CR105	USA	USA	CR	CD	nose	col	++	-	2011	R. norvegicus	NA	ND	+
CR107a	USA	USA	CR	CD	nose	col	++	-	2011	R. norvegicus	NA	ND	+
CR108a	USA	USA	CR	other	nose	col	++	-	2011	R. norvegicus	NA	ND	+
CR110	USA	USA	CR	Sprague Dawley	nose	col	++	-	2011	R. norvegicus	NA	ND	+
CR168	USA	USA	CR	other	nose	col	++	-	2012	R. norvegicus	NA	ND	+
CR176	USA	USA	CR	unknown	nose	col	++	-	2012	R. norvegicus	NA	ND	+
CR177	USA	USA	CR	other	nose	col	++	-	2012	R. norvegicus	NA	ND	+
CR178	USA	USA	CR	unknown	nose	col	++	-	2012	R. norvegicus	NA	ND	+
CR181	USA	USA	CR	unknown	nose	col	++	-	2012	R. norvegicus	NA	ND	+
CR182	USA	USA	CR	unknown	nose	col	++	-	2012	R. norvegicus	NA	ND	+
CR183	USA	USA	CR	unknown	nose	col	++	-	2012	R. norvegicus	NA	ND	+
CR186	USA	USA	CR	unknown	nose	col	++	-	2012	R. norvegicus	NA	ND	+
DKFZ_U44	GER	BW	Ulm	CDxBDIX	Caecum	col	++	-	2008	R. norvegicus	NA	ND	+
DKFZ_1983_237_01	GER	BW	Heidelberg	BDVI	abscess	abscess	++	-	1983	R. norvegicus	NA	ND	+
DKFZ_1983_275_01	GER	BW	Heidelberg	Sprague Dawley	abscess	abscess	++	-	1983	R. norvegicus	NA	ND	+
DKFZ_1983_328_02	GER	BW	Heidelberg	Sprague Dawley	abscess	abscess	++	-	1983	R. norvegicus	NA	ND	+
DKFZ_2005_016_03	GER	BW	Heidelberg	LEWIS	kidney	col	++	-	2005	R. norvegicus	NA	ND	+
DKFZ 520	GER	BW	Heidelberg	Sprague Dawley	throat	col	++	-	2008	R. norvegicus	NA	ND	+
DKFZ_2014_104_03	GER	BW	Heidelberg	Sprague Dawley	gut content	col	++	-	2014	R. norvegicus	NA	ND	+
DKFZ566-01	GER	BW	Heidelberg	Sprague Dawley	throat	col	++	-	2007	R. norvegicus	NA	ND	+
A734/2	GER	BW	Heidelberg	Sprague Dawley	gut content	col	++	-	2014	R. norvegicus	NA	ND	+
A734/3	GER	BW	Heidelberg	Sprague Dawley	gut content	col	++	-	2014	R. norvegicus	NA	ND	+
A735/1	GER	BW	Heidelberg	Sprague Dawley	gut content	col	++	-	2014	R. norvegicus	NA	ND	+
A754/1	GER	BW	Heidelberg	Wistar	throat	col	++	-	2014	R. norvegicus	NA	ND	+
A754/3	GER	BW	Heidelberg	Wistar	throat	col	++	-	2014	R. norvegicus	NA	ND	+
A798/3	GER	BW	Heidelberg	BDX	throat	col	++	-	2014	R. norvegicus	NA	ND	+
1 Probability of contact to humans or livestock, based on the location of capture: -, no contact; +, possible contact; ++ likely contact
2 Species definition was based on cytB sequencing
Abbreviations: BW, Baden-Württemberg; CAN, Canada; col: colonization; f, female; g, gram; GER, Germany; HE, Hesse; JPN, Japan; m, male; MV, Mecklenburg Western Pomerania; NA, not available; ND, not determined; NRW, North Rhine-Westphalia, USA, United States of America; ZSFV, Central Core & Research Facility of Laboratory Animals (University Medicine Greifswald, Germany)

## Sheet: Tab S6_S.a. wild
Table S6: Genotype, virulence genes, phage patterns, and penicillin resistance of S. aureus isolates from wild rats.
	Epidemiology									Phenotyping			Genotyping				Virulence genes									Phage integrases								Resistances
Strain ID	Country	State	Location	Probable contact to humans1	Probable contact to livestock1	Year	Species2	Sex		Haemolysis on blood agar	Staph test3	x	spa type	spa repeat succession	Deduced MLST CC4		MGE-carried SAg genes5	Non-MGE-carried SAg genes6	agr	eta, etd	pvl	sak	chp	scn		sa1int	sa2int	sa3int	sa4int	sa5int	sa6int	sa7int		mecA	mecB	mecC	mecD	mecU	PenR,7
KS/17/133	GER	MV	fields and meadows	-	-	2015	R. norvegicus	f		+	+		t1048	04-82-17-25-17-25-25-16-16-17	CC130		-	-	3	-	-	-	-	-		+	-	-	-	-	-	-		-	-	-	-	-	+
KS/17/134	GER	MV	fields and meadows	-	-	2015	R. norvegicus	m		+	+		t1048	04-82-17-25-17-25-25-16-16-17	CC130		-	-	3	-	-	-	-	-		+	-	-	-	-	-	-		-	-	-	-	-	-
KS/17/137	GER	MV	fields and meadows	-	-	2015	R. norvegicus	ND		+	+		t1048	04-82-17-25-17-25-25-16-16-17	CC130		-	-	3	-	-	-	-	-		+	-	-	-	-	-	-		-	-	-	-	-	-
KS/17/146	GER	MV	fields and meadows	-	-	2015	R. norvegicus	f		+	+		t1048	04-82-17-25-17-25-25-16-16-17	CC130		-	-	3	-	-	-	-	-		+	-	-	-	-	-	-		-	-	-	-	-	-
KS/17/172	GER	NRW_1	meat processing, close to settlements	+	-	2016	R. norvegicus	m		+	+		t208	04-20-17-17-31-31-24-17-17-17-17-25	CC49		-	-	2	-	-	-	-	-		+	-	-	-	+	-	-		-	-	-	-	-	+
KS/17/175	GER	NRW_1	town	++	-	2016	R. norvegicus	m		ND	ND		t685	15-12-16-02-16-02-24-24	CC30		a tst	gimnou	3	-	-	+	-	+		-	-	+	-	-	+	-		+	-	-	-	+	+
KS/17/186	GER	NRW_1	close to settlements	+	-	2016	R. norvegicus	m		+	+		t208	04-20-17-17-31-31-24-17-17-17-17-25	CC49		-	-	2	-	-	-	-	-		+	-	-	-	+	-	-		-	-	-	-	-	-
KS/17/334	CZE	MSR	pheasant farm	+	-	2013	R. norvegicus	f		+	+		t14284	04-20-17-17-31-31-31-24-17-17-17-17-25	CC49		-	-	2	-	-	-	-	-		+	-	-	-	-	+	-		-	-	-	-	-	-
KS/17/335	CZE	MSR	pheasant farm	+	-	2013	R. norvegicus	m		+	+		t14284	04-20-17-17-31-31-31-24-17-17-17-17-25	CC49		-	-	2	-	-	-	-	-		+	-	-	-	-	+	-		-	-	-	-	-	-
KS/17/336	CZE	MSR	pheasant farm	+	-	2013	R. norvegicus	f		+	+		t14284	04-20-17-17-31-31-31-24-17-17-17-17-25	CC49		-	-	2	-	-	-	-	-		+	-	-	-	-	+	-		-	-	-	-	-	-
KS/17/339	CZE	MSR	pheasant farm	+	-	2013	R. norvegicus	f		+	ND		t14284	04-20-17-17-31-31-31-24-17-17-17-17-25	CC49		-	-	2	-	-	-	-	-		+	-	-	-	-	+	-		-	-	-	-	-	-
KS/17/340	CZE	MSR	pheasant farm	+	-	2013	R. norvegicus	m		+	ND		t14284	04-20-17-17-31-31-31-24-17-17-17-17-25	CC49		-	-	2	-	-	-	-	-		+	+	-	-	-	+	-		-	-	-	-	-	-
KS/17/341	CZE	MSR	pheasant farm	+	-	2013	R. norvegicus	f		+	ND		t14284	04-20-17-17-31-31-31-24-17-17-17-17-25	CC49		-	-	2	-	-	-	-	-		+	-	-	-	-	+	-		-	-	-	-	-	-
KS/17/343	CZE	MSR	pheasant farm	+	-	2013	R. norvegicus	f		+	+		t14284	04-20-17-17-31-31-31-24-17-17-17-17-25	CC49		-	-	2	-	-	-	-	-		+	-	-	-	-	+	-		-	-	-	-	-	-
KS/17/345	CZE	MSR	pheasant farm	+	-	2013	R. norvegicus	m		+	ND		t843	04-82-17-25-17-25-25-16-17	CC130		-	-	3	-	-	-	-	-		+	-	-	-	-	-	-		-	-	-	-	-	-
KS/17/348	CZE	MSR	pheasant farm	+	-	2013	R. norvegicus	m		+	+		t14284	04-20-17-17-31-31-31-24-17-17-17-17-25	CC49		-	-	2	-	-	-	-	-		+	+	-	-	-	+	-		-	-	-	-	-	-
KS/17/349	CZE	MSR	pheasant farm	+	-	2013	R. norvegicus	f		+	ND		t843	04-82-17-25-17-25-25-16-17	CC130		-	-	3	-	-	-	-	-		+	-	-	-	-	-	-		-	-	-	-	-	-
KS/17/350	CZE	MSR	pheasant farm	+	-	2013	R. norvegicus	f		+	ND		t843	04-82-17-25-17-25-25-16-17	CC130		-	-	3	-	-	-	-	-		+	-	-	-	-	-	-		-	-	-	-	-	-
KS/17/353	CZE	MSR	pheasant farm	+	-	2013	R. norvegicus	m		+	ND		t843	04-82-17-25-17-25-25-16-17	CC130		-	-	3	-	-	-	-	-		-	-	-	-	-	-	-		-	-	-	-	-	-
KS/17/356	CZE	MSR	pheasant farm	+	-	2013	R. norvegicus	f		+	ND		t843	04-82-17-25-17-25-25-16-17	CC130		-	-	3	-	-	-	-	-		-	-	-	-	-	-	-		-	-	-	-	-	-
KS/17/357	CZE	MSR	pheasant farm	+	-	2013	R. norvegicus	m		+	ND		t14284	04-20-17-17-31-31-31-24-17-17-17-17-25	CC49		-	-	2	-	-	-	-	-		+	-	-	-	-	+	-		-	-	-	-	-	-
KS/17/358	CZE	MSR	pheasant farm	+	-	2013	R. norvegicus	f		+	+		t843	04-82-17-25-17-25-25-16-17	CC130		-	-	3	-	-	-	-	-		+	-	-	-	-	-	-		-	-	-	-	-	-
KS/17/359	CZE	MSR	pheasant farm	+	-	2013	R. norvegicus	f		+	ND		t14284	04-20-17-17-31-31-31-24-17-17-17-17-25	CC49		-	-	2	-	-	-	-	-		+	+	-	-	-	+	-		-	-	-	-	-	-
KS/17/360	CZE	MSR	pheasant farm	+	-	2013	R. norvegicus	f		+	ND		t14284	04-20-17-17-31-31-31-24-17-17-17-17-25	CC49		-	-	2	-	-	-	-	-		+	-	-	-	-	+	-		-	-	-	-	-	+
KS/17/362	CZE	MSR	pheasant farm	+	-	2013	R. norvegicus	m		+	ND		t14284	04-20-17-17-31-31-31-24-17-17-17-17-25	CC49		-	-	2	-	-	-	-	-		+	+	-	-	-	+	-		-	-	-	-	-	-
KS/17/378*	GER	BW	zoo, pest animal	+	+	2012	R. norvegicus	f		+	ND		t843	04-82-17-25-17-25-25-16-17	CC130		-	-	3	-	-	-	-	-		-	-	+	-	-	-	-		-	-	+	-	+	+
KS/18/173	GER	NRW_2	livestock farms	+	++	2016	R. norvegicus	m		+	ND		t1535	04-82-17-25-17-25-16-17	CC130		-	-	3	-	-	-	-	-		+	-	-	-	+	+	-		-	-	-	-	-	-
KS/18/177	GER	NRW_2	livestock farms	+	++	2016	R. norvegicus	m		+	ND		t3256	04-82-17-25-17-25-25-25-16-17	CC130		-	-	3	-	-	-	-	-		+	-	-	-	-	+	-		-	-	-	-	-	+
KS/18/179	GER	NRW_2	livestock farms	+	++	2016	R. norvegicus	f		+	ND		t3256	04-82-17-25-17-25-25-25-16-17	CC130		-	-	3	-	-	-	-	-		+	-	-	-	+	+	-		-	-	-	-	-	+
KS/18/186	GER	NRW_2	livestock farms	+	++	2016	R. norvegicus	f		+	ND		t1535	04-82-17-25-17-25-16-17	CC130		-	-	3	-	-	-	-	-		+	-	-	-	+	+	-		-	-	-	-	-	+
KS/18/187	GER	NRW_2	livestock farms	+	++	2016	R. norvegicus	f		+	ND		t3256	04-82-17-25-17-25-25-25-16-17	CC130		-	-	3	-	-	-	-	-		+	-	-	-	+	+	-		-	-	-	-	-	+
KS/18/189	GER	NRW_2	livestock farms	+	++	2016	R. norvegicus	f		+	ND		t1535	04-82-17-25-17-25-16-17	CC130		-	-	3	-	-	-	-	-		+	-	-	-	+	+	-		-	-	-	-	-	+
KS/18/190	GER	NRW_2	livestock farms	+	++	2016	R. norvegicus	m		ND	ND		t1535	04-82-17-25-17-25-16-17	CC130		-	-	3	-	-	-	-	-		+	-	-	-	+	+	-		-	-	-	-	-	+
KS/18/194	GER	NRW_2	livestock farms	+	++	2016	R. norvegicus	m		ND	ND		t3256	04-82-17-25-17-25-25-25-16-17	CC130		-	-	3	-	-	-	-	-		+	-	-	-	-	+	-		-	-	-	-	-	+
KS/18/201	GER	NRW_2	livestock farms	+	++	2016	R. norvegicus	m		+	+		t3256	04-82-17-25-17-25-25-25-16-17	CC130		-	-	3	-	-	-	-	-		-	-	-	-	-	+	-		-	-	-	-	-	+
KS/18/203	GER	NRW_2	livestock farms	+	++	2016	R. norvegicus	m		+	+		t3256	04-82-17-25-17-25-25-25-16-17	CC130		-	-	3	-	-	-	-	-		-	-	-	-	-	+	-		-	-	-	-	-	+
KS/18/1583	GER	NRW_1	farm, close to settlements	+	++	2014	R. norvegicus	m		ND	ND		t19038	04-20-17-17-31-24-17-17-17-17-17-25	CC49		-	-	2	-	-	-	-	-		+	-	-	-	+	-	-		-	-	-	-	-	+
1 Probability of contact to humans or livestock, based on the location of capture: -, no contact; +, possible contact; ++, likely contact
2 Species definition was based on cytB sequencing
3 S. aureus-specific latex agglutination test (ProlexTM Staph Xtra Latex Kit, Pro-Lab Diagnostics, Richmond Hill, ON, Canada)
4 spa types were clustered by BURP analysis into CCs and corresponding MLST CCs were deduced using the Ridom database
5 Staphylococcal enterotoxins (SEs) are indicated by single letters (a = sea, etc.); tst, toxic shock syndrome toxin 1 gene
6 egc, superantigen genes of the enterotoxin gene cluster, i.e. seg, sei, sem, sen, seo and seu
7 PenR, penicillin resistance (determined based on the MIC of penicillin against S. aureus strains using the Broth Microdilution Method; resistance breakpoint was set to ≥0.25 µg/mL): -, susceptible; +, resistant
* Ref. [90]
Abbreviations: agr, accessory gene regulator; BW, Baden-Württemberg; CC, clonal complex; chp, gene encoding the chemotaxis inhibitory protein; CZE, Czech Republic; eta/etd, exfoliative toxins a and d; f, female; GER, Germany; m, male; mecA/mecB/mecC/mecD/mecU; methicillin resistance coding gene mecA/mecB/mecC/mecD/mecU; MRSA, methicillin-resistant S. aureus; MV, Mecklenburg-Western Pomerania; ND,…

## Sheet: Tab S7_S.a. captive wild
Tab S7: Genotype, virulence genes, phage patterns, and penicillin resistance of S. aureus isolates from captive wild rats.
	Epidemiology												Phenotyping			Genotyping					Virulence genes									Phage integrases								Resistances
Strain ID	Country	Husbandry State	Strain	Habitat	Sampling site	Type of infection	Probable contact to humans1	Probable contact to livestock1	Year	Species2	Sex		Haemolysis on blood agar	Staph test3		spa type	spa repeat succession	MLST	Deduced MLST CC4		MGE-carried SAg genes5	Non-MGE-carried SAg genes6	agr	eta, etd	pvl	sak	chp	scn		sa1int	sa2int	sa3int	sa4int	sa5int	sa6int	sa7int		mecA	mecB	mecC	mecD	mecU	PenR,7
KS/17/19	GER	BB	Neufels	captured on a livestock farm	nose	col	++	++	2016	R. rattus	f		ND	ND		t011	08-16-02-25-34-24-25	ND	CC398		-	-	1	-	-	-	-	-		-	+	-	-	-	-	-		+	-	-	-	+	+
KS/17/20	GER	BB	Neufels	captured on a livestock farm	nose	col	++	++	2016	R. rattus	f		+	+		t011	08-16-02-25-34-24-25	ND	CC398		-	-	1	-	-	-	-	-		-	+	-	-	-	-	-		+	-	-	-	+	+
KS/17/21	GER	BB	Neufels	captured on a livestock farm	nose	col	++	++	2016	R. rattus	f		+	+		t011	08-16-02-25-34-24-25	ND	CC398		-	-	1	-	-	-	-	-		-	+	-	-	-	-	-		+	-	-	-	+	+
KS/17/22	GER	BB	Neufels	captured on a livestock farm	nose	col	++	++	2016	R. rattus	f		+	+		t011	08-16-02-25-34-24-25	ND	CC398		-	-	1	-	-	-	-	-		-	+	-	-	-	-	-		+	-	-	-	+	+
KS/17/31	GER	BB	Tilbury	originally from GBR, likely urban	nose	col	++	-	2016	R. rattus	m		+	+		t3256	04-82-17-25-17-25-25-25-16-17	ND	CC130		-	-	3	-	-	-	-	-		-	+	-	-	-	-	-		-	-	-	-	-	-
KS/17/37	GER	BB	Tilbury	originally from GBR, likely urban	nose	col	++	-	2016	R. rattus	f		+	+		t3256	04-82-17-25-17-25-25-25-16-17	ND	CC130		-	-	3	-	-	-	-	-		-	+	-	-	-	-	-		-	-	-	-	-	-
KS/17/41	GER	BB	Tilbury	originally from GBR, likely urban	nose	col	++	-	2016	R. rattus	f		+	+		t3570	04-82-17-25-17-25-17	ND	ST890		-	-	3	-	-	-	-	-		+	-	-	-	-	-	-		-	-	-	-	-	-
KS/17/42	GER	BB	Tilbury	originally from GBR, likely urban	nose	col	++	-	2016	R. rattus	f		ND	ND		t3570	04-82-17-25-17-25-17	ND	ST890		-	-	3	-	-	-	-	-		+	-	-	-	-	-	-		-	-	-	-	-	-
KS/17/43	GER	BB	Tilbury	originally from GBR, likely urban	nose	col	++	-	2016	R. rattus	f		+	+		t3570	04-82-17-25-17-25-17	ND	ST890		-	-	3	-	-	-	-	-		+	-	-	-	-	-	-		-	-	-	-	-	-
KS/17/44	GER	BB	Tilbury	originally from GBR, likely urban	nose	col	++	-	2016	R. rattus	f		+	+		t3570	04-82-17-25-17-25-17	ND	ST890		-	-	3	-	-	-	-	-		+	-	-	-	-	-	-		-	-	-	-	-	-
KS/17/45	GER	BB	Tilbury	originally from GBR, likely urban	nose	col	++	-	2016	R. rattus	f		ND	ND		t3570	04-82-17-25-17-25-17	ND	ST890		-	-	3	-	-	-	-	-		+	-	-	-	-	-	-		-	-	-	-	-	-
KS/17/46	GER	BB	Neufels	captured on a livestock farm	nose	col	++	++	2016	R. rattus	f		+	+		t011	08-16-02-25-34-24-25	ND	CC398		-	-	1	-	-	-	-	-		-	+	-	-	-	-	-		+	-	-	-	+	+
KS/17/47	GER	BB	Neufels	captured on a livestock farm	nose	col	++	++	2016	R. rattus	m		ND	ND		t3256	04-82-17-25-17-25-25-25-16-17	ND	CC130		-	-	3	-	-	-	-	-		-	-	-	-	-	-	-		-	-	-	-	-	-
KS/17/67	GER	BB	MHS	different origins, urban and possibly farm	nose	col	++	-	2016	R. norvegicus	m		+	+		t3256	04-82-17-25-17-25-25-25-16-17	ND	CC130		-	-	3	-	-	-	-	-		-	-	-	-	-	-	-		-	-	-	-	-	-
KS/17/389	GER	BE	Neufels	captured on a livestock farm	nose	col	++	++	2017	R. rattus	m		+	ND		t14284	04-20-17-17-31-31-31-24-17-17-17-17-25	ND	CC49		-	-	2	-	-	-	-	-		+	-	-	-	-	+	-		-	-	-	-	-	-
KS/17/390	GER	BE	Neufels	captured on a livestock farm	nose	col	++	++	2017	R. rattus	m		-	ND		t843	04-82-17-25-17-25-25-16-17	ND	CC130		-	-	3	-	-	-	-	-		+	+	+	-	-	-	-		-	-	+	-	+	+
KS/17/391	GER	BE	Neufels	captured on a livestock farm	nose	col	++	++	2017	R. rattus	m		-	ND		t011	08-16-02-25-34-24-25	ND	CC398		-	-	1	-	-	-	-	-		+	+	-	-	-	-	-		-	-	-	-	-	+
KS/17/392	GER	BE	Neufels	captured on a livestock farm	nose	col	++	++	2017	R. rattus	m		+	ND		t011	08-16-02-25-34-24-25	ND	CC398		-	-	1	-	-	-	-	-		+	+	-	-	-	-	-		-	-	-	-	-	+
KS/17/393	GER	BE	Neufels	captured on a livestock farm	nose	col	++	++	2017	R. rattus	f		+	ND		t011	08-16-02-25-34-24-25	ND	CC398		-	-	1	-	-	-	-	-		+	+	-	-	-	-	-		-	-	-	-	-	+
KS/17/394	GER	BE	Neufels	captured on a livestock farm	nose	col	++	++	2017	R. rattus	m		+	ND		t011	08-16-02-25-34-24-25	ND	CC398		-	-	1	-	-	-	-	-		+	+	-	-	-	-	-		-	-	-	-	-	+
KS/17/395	GER	BE	Neufels	captured on a livestock farm	nose	col	++	++	2017	R. rattus	f		+	ND		t011	08-16-02-25-34-24-25	ND	CC398		-	-	1	-	-	-	-	-		+	+	-	-	-	-	-		-	-	-	-	-	+
KS/17/396	GER	BE	Neufels	captured on a livestock farm	nose	col	++	++	2017	R. rattus	m		+	ND		t011	08-16-02-25-34-24-25	ND	CC398		-	-	1	-	-	-	-	-		+	+	-	-	-	-	-		-	-	-	-	-	+
KS/17/397	GER	BE	Neufels	captured on a livestock farm	nose	col	++	++	2017	R. rattus	m		ND	ND		t011	08-16-02-25-34-24-25	ND	CC398		-	-	1	-	-	-	-	-		+	+	-	-	-	-	-		-	-	-	-	-	+
KS/17/399	GER	BE	Neufels	captured on a livestock farm	nose	col	++	++	2017	R. rattus	m		+	ND		t011	08-16-02-25-34-24-25	ND	CC398		-	-	1	-	-	-	-	-		+	+	-	-	-	-	-		-	-	-	-	-	+
KS/17/401	GER	BE	Neufels	captured on a livestock farm	nose	col	++	++	2017	R. rattus	f		+	ND		t011	08-16-02-25-34-24-25	ND	CC398		-	-	1	-	-	-	-	-		+	+	-	-	-	-	-		-	-	-	-	-	+
KS/17/402	GER	BE	Neufels	captured on a livestock farm	nose	col	++	++	2017	R. rattus	m		+	ND		t011	08-16-02-25-34-24-25	ND	CC398		-	-	1	-	-	-	-	-		+	+	-	-	-	-	-		-	-	-	-	-	+
KS/17/403	GER	BE	Neufels	captured on a livestock farm	nose	col	++	++	2017	R. rattus	m		+	ND		t011	08-16-02-25-34-24-25	ND	CC398		-	-	1	-	-	-	-	-		+	+	-	-	-	-	-		-	-	-	-	-	+
KS/17/405	GER	BE	Neufels	captured on a livestock farm	nose	col	++	++	2017	R. rattus	m		+	ND		t011	08-16-02-25-34-24-25	ND	CC398		-	-	1	-	-	-	-	-		+	+	-	-	-	-	-		-	-	-	-	-	+
KS/17/406	GER	BE	Neufels	captured on a livestock farm	nose	col	++	++	2017	R. rattus	f		+	ND		t011	08-16-02-25-34-24-25	ND	CC398		-	-	1	-	-	-	-	-		+	+	-	-	-	-	-		-	-	-	-	-	+
KS/17/407	GER	BE	Neufels	captured on a livestock farm	nose	col	++	++	2017	R. rattus	m		+	ND		t011	08-16-02-25-34-24-25	ND	CC398		-	-	1	-	-	-	-	-		+	+	-	-	-	-	-		-	-	-	-	-	+
KS/17/409	GER	BE	Neufels	captured on a livestock farm	nose	col	++	++	2017	R. rattus	f		+	ND		t011	08-16-02-25-34-24-25	ND	CC398		-	-	1	-	-	-	-	-		+	+	-	-	-	-	-		-	-	-	-	-	+
KS/17/410	GER	BE	Neufels	captured on a livestock farm	nose	col	++	++	2017	R. rattus	m		+	ND		t011	08-16-02-25-34-24-25	ND	CC398		-	-	1	-	-	-	-	-		+	+	-	-	-	-	-		-	-	-	-	-	+
KS/17/411	GER	BE	Neufels	captured on a livestock farm	nose	col	++	++	2017	R. rattus	m		+	ND		t011	08-16-02-25-34-24-25	ND	CC398		-	-	1	-	-	-	-	-		+	+	-	-	-	-	-		-	-	-	-	-	+
KS/17/413	GER	BE	Neufels	captured on a livestock farm	nose	col	++	++	2017	R. rattus	f		+	ND		t011	08-16-02-25-34-24-25	ND	CC398		-	-	1	-	-	-	-	-		+	+	-	-	-	+	-		-	-	-	-	-	+
KS/17/414	GER	BE	Neufels	captured on a livestock farm	nose	col	++	++	2017	R. rattus	m		ND	ND		t011	08-16-02-25-34-24-25	ND	CC398		-	-	1	-	-	-	-	-		+	+	-	-	-	+	-		-	-	-	-	-	+
KS/17/415	GER	BE	Neufels	captured on a livestock farm	nose	col	++	++	2017	R. rattus	m		+	ND		t011	08-16-02-25-34-24-25	ND	CC398		-	-	1	-	-	-	-	-		+	+	-	-	-	+	-		-	-	-	-	-	+
KS/17/416	GER	BE	NA	captured in a city	nose	col	++	-	2017	R. norvegicus	m		+	ND		t843	04-82-17-25-17-25-25-16-17	ND	CC130		-	-	3	-	-	-	-	-		+	+	-	-	-	-	-		-	-	-	-	-	+
KS/17/418	GER	BE	Neufels	captured on a livestock farm	nose	col	++	++	2017	R. rattus	f		+	ND		t011	08-16-02-25-34-24-25	ND	CC398		-	-	1	-	-	-	-	-		+	+	-	-	-	-	-		-	-	-	-	-	+
KS/17/419	GER	BE	Neufels	captured on a livestock farm	nose	col	++	++	2017	R. rattus	m		+	ND		t011	08-16-02-25-34-24-25	ND	CC398		-	-	1	-	-	-	-	-		+	+	-	-	-	+	-		-	-	-	-	-	+
KS/17/420	GER	BE	Neufels	captured on a livestock farm	nose	col	++	++	2017	R. rattus	m		+	ND		t011	08-16-02-25-34-24-25	ND	CC398		-	-	1	-	-	-	-	-		+	+	-	-	+	-	-		-	-	-	-	-	+
KS/17/421	GER	BE	NA	captured in a city	nose	col	++	-	2017	R. norvegicus	f		+	ND		t843	04-82-17-25-17-25-25-16-17	ND	CC130		-	-	3	-	-	-	-	-		+	-	-	-	-	-	-		-	-	-	-	-	-
1 Probability of contact to humans or livestock, based on the location of capture: -, no contact; +, possible contact; ++, likely contact
2 Species definition was based on cytB sequencing
3 S. aureus-specific latex agglutination test (ProlexTM Staph Xtra Latex Kit, Pro-Lab Diagnostics, Richmond Hill, ON, Canada)
4 spa types were clustered by BURP analysis into CCs and corresponding MLSTCCs were deduced using the Ridom database
5 Staphylococcal enterotoxins (SEs) are indicated by single letters (a = sea, etc.); tst, toxic shock syndrome toxin 1 gene
6 egc, superantigen genes of the enterotoxin gene cluster, i.e. seg, sei, sem, sen, seo and seu
7 PenR, penicillin resistance (determined based on the MIC of penicillin against S. aureus strains using the Broth Microdilution Method; resistance breakpoint was set to ≥0.25 µg/mL): -, susceptible; +, resistant
Abbreviations: agr, accessory gene regulator; BB, Brandenburg; BE: Berlin; CC, clonal complex; chp, gene encoding the chemotaxis inhibitory protein; col, colonization; eta/etd, exfoliative toxins a and d; f, female; GER, Germany; mecA/mecB/mecC/mecD/mecU; m, male; methicillin resistance coding gene mecA/mecB/mecC/mecD/mecU; MGE, mobile genetic elements; MLST, multi-locus sequence typing; MRSA, me…

## Sheet: Tab S8_S.a. lab rat
Tab S8: Genotype, virulence genes, phage patterns, and penicillin resistance of S. aureus isolates from laboratory rats.
	Epidemiology											Phenotyping			Genotyping					Virulence genes									Phage integrases								Resistances
Strain ID	Country	State	Habitat	Sampling site	Type of infection	Probable contact to humans1	Probable contact to livestock1	Year	Species2	Sex		Haemolysis on blood agar	Staph test3		spa type	spa repeat succession	MLST	Deduced MLST CC4		MGE-carried SAg genes5	Non-MGE-carried SAg genes6	agr	eta, etd	pvl	sak	chp	scn		sa1int	sa2int	sa3int	sa4int	sa5int	sa6int	sa7int		mecA	mecB	mecC	mecD	mecU	PenR,7
KS/18/214	GER	MV	laboratory rat	nose	col	++	-	2017	R. norvegicus	f		+	ND		t084	07-23-12-34-34-12-12-23-02-12-23	ND	CC15		-	-	2	-	-	-	+	+		-	-	-	-	-	-	-		-	-	-	-	-	+
KS/18/220	GER	MV	laboratory rat	nose	col	++	-	2017	R. norvegicus	f		+	+		t091	07-23-21-17-34-12-23-02-12-23	ND	CC7		p	-	1	-	-	+	-	+		+	-	+	-	-	-	-		-	-	-	-	-	+
KS/18/222	GER	MV	laboratory rat	nose	col	++	-	2017	R. norvegicus	m		+	ND		t091	07-23-21-17-34-12-23-02-12-23	ND	CC7		p	-	1	-	-	+	-	+		-	-	+	-	-	-	-		-	-	-	-	-	+
KS/18/223	GER	MV	laboratory rat	nose	col	++	-	2017	R. norvegicus	f		+	ND		t084	07-23-12-34-34-12-12-23-02-12-23	ND	CC15		p	-	2	-	-	-	+	+		-	-	+	-	-	-	-		-	-	-	-	-	+
KS/18/224	GER	MV	laboratory rat	nose	col	++	-	2017	R. norvegicus	m		+	ND		t084	07-23-12-34-34-12-12-23-02-12-23	ND	CC15		-	-	2	-	-	-	+	+		-	-	+	-	-	-	-		-	-	-	-	-	+
KS/18/225	GER	MV	laboratory rat	nose	col	++	-	2017	R. norvegicus	f		+	ND		t084	07-23-12-34-34-12-12-23-02-12-23	ND	CC15		-	-	2	-	-	-	+	+		-	-	-	-	-	-	-		-	-	-	-	-	+
KS/18/226	GER	MV	laboratory rat	nose	col	++	-	2017	R. norvegicus	f		+	+		t084	07-23-12-34-34-12-12-23-02-12-23	ND	CC15		-	-	2	-	-	-	-	-		-	-	-	-	-	-	-		-	-	-	-	-	+
KS/18/1214	GER	HE	feeder rats from zoo	nose	col	++	-	2018	R. norvegicus	m		ND	ND		t127	07-23-21-16-34-33-13	ND	CC1		h	-	3	-	-	-	-	-		-	-	-	-	-	-	-		-	-	-	-	-	-
KS/18/1216	GER	HE	feeder rats from zoo	nose	col	++	-	2018	R. norvegicus	f		ND	ND		t084	07-23-12-34-34-12-12-23-02-12-23	ND	CC15		-	-	2	-	-	-	+	+		-	-	-	-	-	-	-		-	-	-	-	-	+
KS/18/1219	GER	HE	feeder rats from zoo	nose	col	++	-	2018	R. norvegicus	m		ND	ND		t084	07-23-12-34-34-12-12-23-02-12-23	ND	CC15		-	-	2	-	-	-	+	+		-	-	-	-	-	-	-		-	-	-	-	-	+
KS/18/1220	GER	HE	feeder rats from zoo	nose	col	++	-	2018	R. norvegicus	m		ND	ND		t084	07-23-12-34-34-12-12-23-02-12-23	ND	CC15		-	-	2	-	-	-	+	+		-	-	-	-	-	-	-		-	-	-	-	-	+
KS/18/1223	GER	HE	feeder rats from zoo	nose	col	++	-	2018	R. norvegicus	f		ND	ND		t127	07-23-21-16-34-33-13	ND	CC1		h	-	3	-	-	-	-	-		-	-	-	-	-	-	-		-	-	-	-	-	-
KS/18/1224	GER	HE	feeder rats from zoo	nose	col	++	-	2018	R. norvegicus	m		ND	ND		t084	07-23-12-34-34-12-12-23-02-12-23	ND	CC15		-	-	2	-	-	-	+	+		-	-	-	-	-	-	-		-	-	-	-	-	+
KS/18/1226	GER	HE	feeder rats from zoo	nose	col	++	-	2018	R. norvegicus	f		ND	ND		t127	07-23-21-16-34-33-13	ND	CC1		h	-	3	-	-	-	-	-		-	-	-	-	-	-	-		-	-	-	-	-	+
CR001	USA	-	laboratory rat	nose	col	++	-	2011	R. norvegicus	NA		ND	ND		t189	07-23-12-21-17-34	ND	CC188		-	-	1	-	-	+	-	+		-	-	+	-	-	-	-		-	-	-	-	-	+
CR008	USA	-	laboratory rat	nose	col	++	-	2011	R. norvegicus	NA		ND	ND		t056	04-20-12-17-20-17-12-17-17	ND	CC101		-	-	1	-	-	+	-	+		-	-	+	-	-	-	-		-	-	-	-	-	+
CR012	USA	-	laboratory rat	nose	col	++	-	2010	R. norvegicus	NA		ND	ND		t786	07-12-21-17-13-34-34-33-34	ND	CC88		-	-	3	-	-	-	-	-		+	-	-	-	-	-	-		-	-	-	-	-	-
CR020	USA	-	laboratory rat	nose	col	++	-	2011	R. norvegicus	NA		ND	ND		t3698	08-12-23-02-12-23	ST199	CC15		-	-	2	-	-	+	+	+		-	+	+	-	-	-	-		-	-	-	-	-	+
CR024	USA	-	laboratory rat	nose	col	++	-	2011	R. norvegicus	NA		ND	ND		t986	11-19-12-21-17-34-24-24-24-34-22-25	ND	CC8		-	-	1	-	-	-	-	-		-	+	-	-	-	-	-		-	-	-	-	-	+
CR027	USA	-	laboratory rat	nose	col	++	-	2011	R. norvegicus	NA		ND	ND		t186	07-12-21-17-13-13-34-34-33-34	ND	CC88		-	-	3	-	-	+	-	+		-	-	+	-	-	-	-		-	-	-	-	-	-
CR028	JPN	-	laboratory rat	nose	col	++	-	2011	R. norvegicus	NA		ND	ND		t189	07-23-12-21-17-34	ND	CC188		-	-	1	-	-	-	-	-		+	-	-	-	-	-	-		-	-	-	-	-	+
CR031	CAN	-	laboratory rat	nose	col	++	-	2011	R. norvegicus	NA		ND	ND		t189	07-23-12-21-17-34	ND	CC188		-	-	1	-	-	+	-	+		-	-	+	-	-	-	-		-	-	-	-	-	+
CR032	JPN	-	laboratory rat	nose	col	++	-	2011	R. norvegicus	NA		ND	ND		t189	07-23-12-21-17-34	ND	CC188		-	-	1	-	-	+	-	+		+	-	+	-	-	-	-		-	-	-	-	-	-
CR033	USA	-	laboratory rat	nose	col	++	-	2011	R. norvegicus	NA		ND	ND		t189	07-23-12-21-17-34	ND	CC188		-	-	1	-	-	-	-	-		+	-	-	-	-	-	-		-	-	-	-	-	+
CR037	JPN	-	laboratory rat	nose	col	++	-	2011	R. norvegicus	NA		ND	ND		t1767	11-19-12-21-17-34-24-24-34-22-25	ND	CC8		-	-	1	-	-	-	-	-		+	+	-	-	-	-	-		-	-	-	-	-	-
CR038	USA	-	laboratory rat	nose	col	++	-	2011	R. norvegicus	NA		ND	ND		t1767	11-19-12-21-17-34-24-24-34-22-25	ND	CC8		-	-	1	-	-	-	-	-		-	+	-	-	-	-	-		-	-	-	-	-	+
CR041	USA	-	laboratory rat	nose	col	++	-	2011	R. norvegicus	NA		ND	ND		t186	07-12-21-17-13-13-34-34-33-34	ND	CC88		-	-	3	-	-	+	-	+		-	-	+	-	-	-	-		-	-	-	-	-	-
CR042	JPN	-	laboratory rat	nose	col	++	-	2011	R. norvegicus	NA		ND	ND		t1767	11-19-12-21-17-34-24-24-34-22-25	ND	CC8		-	-	1	-	-	-	-	-		+	+	-	-	-	-	-		-	-	-	-	-	+
CR043	JPN	-	laboratory rat	nose	col	++	-	2011	R. norvegicus	NA		ND	ND		t11288	11-10-21-17-34-24-24-34-22-25	ND	CC8		-	-	1	-	-	-	-	-		+	+	-	-	-	-	-		-	-	-	-	-	+
CR048	USA	-	laboratory rat	nose	col	++	-	2011	R. norvegicus	NA		ND	ND		t1767	11-19-12-21-17-34-24-24-34-22-25	ND	CC8		-	-	1	-	-	-	-	-		-	+	-	-	-	-	-		-	-	-	-	-	+
CR067	USA	-	laboratory rat	nose	col	++	-	2011	R. norvegicus	NA		ND	ND		t056	04-20-12-17-20-17-12-17-17	ND	CC101		-	-	1	-	-	+	-	+		-	-	+	-	-	-	-		-	-	-	-	-	+
CR068	USA	-	laboratory rat	nose	col	++	-	2011	R. norvegicus	NA		ND	ND		t186	07-12-21-17-13-13-34-34-33-34	ST88	CC88		-	-	3	-	-	-	-	-		-	-	-	-	-	+	-		-	-	-	-	-	+
CR071	USA	-	laboratory rat	nose	col	++	-	2011	R. norvegicus	NA		ND	ND		t186	07-12-21-17-13-13-34-34-33-34	ND	CC88		-	-	3	-	-	+	-	+		-	-	+	-	-	-	-		-	-	-	-	-	-
CR076	USA	-	laboratory rat	nose	col	++	-	2011	R. norvegicus	NA		ND	ND		t002	26-23-17-34-17-20-17-12-17-16	ND	CC5		-	gimno	2	-	-	-	-	-		-	-	-	-	-	-	-		-	-	-	-	-	+
CR078	USA	-	laboratory rat	nose	col	++	-	2011	R. norvegicus	NA		ND	ND		t084	07-23-12-34-34-12-12-23-02-12-23	ND	CC15		-	-	2	-	-	-	+	+		-	-	-	-	-	-	-		-	-	-	-	-	+
CR080	USA	-	laboratory rat	nose	col	++	-	2011	R. norvegicus	NA		ND	ND		t4133	11-12-21-17-34-24-24-34-22-25	ND	CC8		-	-	1	-	-	-	-	-		-	+	-	-	-	-	-		-	-	-	-	-	+
CR086	USA	-	laboratory rat	nose	col	++	-	2011	R. norvegicus	NA		ND	ND		t056	04-20-12-17-20-17-12-17-17	ND	CC101		-	-	1	-	-	+	-	+		-	-	+	-	-	-	-		-	-	-	-	-	-
CR089	USA	-	laboratory rat	nose	col	++	-	2011	R. norvegicus	NA		ND	ND		t148	07-23-12-21-12-17-20-17-12-12-17	ST72	CC72		cl	gimno	1	-	-	-	-	-		-	-	-	-	-	-	-		-	-	-	-	-	+
CR090	USA	-	laboratory rat	nose	col	++	-	2011	R. norvegicus	NA		ND	ND		t448	07-12-21-17-13-13-34-33-34	ND	CC88		-	-	3	-	-	-	-	-		-	-	-	-	-	-	-		-	-	-	-	-	-
CR095	USA	-	laboratory rat	nose	other	++	-	2011	R. norvegicus	NA		ND	ND		t4533	26-23-17-34-20-17-12-12-12-16	ND	CC5		djr p	gimno	2	-	-	+	-	+		-	-	+	-	-	-	-		-	-	-	-	-	+
CR105	USA	-	laboratory rat	nose	col	++	-	2011	R. norvegicus	NA		ND	ND		t002	26-23-17-34-17-20-17-12-17-16	ND	CC5		-	gimno	2	-	-	-	+	+		-	-	-	-	-	-	-		-	-	-	-	-	-
CR107a	USA	-	laboratory rat	nose	col	++	-	2011	R. norvegicus	NA		ND	ND		t6365	26-23-17-34-20-17-12-12-16	ND	CC5		p	gimno	2	-	-	+	-	+		-	-	+	-	-	-	-		-	-	-	-	-	-
CR108a	USA	-	laboratory rat	nose	col	++	-	2011	R. norvegicus	NA		ND	ND		t786	07-12-21-17-13-34-34-33-34	ND	CC88		-	-	3	-	-	-	-	-		-	-	-	-	-	-	-		-	-	-	-	-	+
CR110	USA	-	laboratory rat	nose	col	++	-	2011	R. norvegicus	NA		ND	ND		t002	26-23-17-34-17-20-17-12-17-16	ND	CC5		-	gimno	2	-	-	-	-	-		-	-	-	-	-	-	-		-	-	-	-	-	-
CR168	USA	-	laboratory rat	nose	col	++	-	2012	R. norvegicus	NA		ND	ND		t084	07-23-12-34-34-12-12-23-02-12-23	ND	CC15		-	-	2	-	-	-	+	+		-	+	-	-	-	-	-		-	-	-	-	-	+
CR176	USA	-	laboratory rat	nose	col	++	-	2012	R. norvegicus	NA		ND	ND		t1767	11-19-12-21-17-34-24-24-34-22-25	ND	CC8		-	-	1	-	-	-	-	-		-	+	-	-	-	-	-		-	-	-	-	-	+
CR177	USA	-	laboratory rat	nose	col	++	-	2012	R. norvegicus	NA		ND	ND		t491	26-23-12-34-34-12-12-23-02-12-23	ND	CC15		-	-	2	-	-	-	+	+		-	+	-	-	+	-	-		-	-	-	-	-	+
CR178	USA	-	laboratory rat	nose	col	++	-	2012	R. norvegicus	NA		ND	ND		t1767	11-19-12-21-17-34-24-24-34-22-25	ND	CC8		-	-	1	-	-	-	-	-		-	+	-	-	-	-	-		-	-	-	-	-	+
CR181	USA	-	laboratory rat	nose	col	++	-	2012	R. norvegicus	NA		ND	ND		t084	07-23-12-34-34-12-12-23-02-12-23	ND	CC15		-	-	2	-	-	-	+	+		-	+	-	-	-	-	-		-	-	-	-	-	-
CR182	USA	-	laboratory rat	nose	col	++	-	2012	R. norvegicus	NA		ND	ND		t7214	07-23-12-34-34-12-34-34-12-12-23-02-12-23	ND	CC15		-	-	2	-	-	-	+	+		-	+	-	-	-	-	-		-	-	-	-	-	+
CR183	USA	-	laboratory rat	nose	col	++	-	2012	R. norvegicus	NA		ND	ND		t209	07-16-12-23-34	ND	CC109		-	gimno	2	eta	-	+	+	+		+	+	+	-	-	-	-		-	-	-	-	-	+
CR186	USA	-	laboratory rat	nose	col	++	-	2012	R. norvegicus	NA		ND	ND		t056	04-20-12-17-20-17-12-17-17	ND	CC101		-	-	1	-	-	+	-	+		-	-	+	-	-	-	-		-	-	-	-	-	+
DKFZ_U44	GER	BW	laboratory rat	caecum	col	++	-	2008	R. norvegicus	NA		ND	ND		t091	07-23-21-17-34-12-23-02-12-23	ND	CC7		-	-	1	-	-	+	-	+		-	-	+	-	-	-	-		-	-	-	-	-	+
DKFZ_1983_237_01	GER	BW	laboratory rat	abscess	abscess	++	-	1983	R. norvegicus	NA		ND	ND		t164	07-06-17-21-34-34-22-34	ND	CC20		-	gimno	1	-	-	+	+	+		+	-	+	-	-	-	-		-	-	-	-	-	+
DKFZ_1983_275_01	GER	BW	laboratory rat	abscess	abscess	++	-	1983	R. norvegicus	NA		ND	ND		t164	07-06-17-21-34-34-22-34	ND	CC20		-	gimno	1	-	-	+	+	+		+	-	+	-	-	-	-		-	-	-	-	-	+
DKFZ_1983_328_02	GER	BW	laboratory rat	abscess	abscess	++	-	1983	R. norvegicus	NA		ND	ND		t164	07-06-17-21-34-34-22-34	ND	CC20		-	gimno	1	-	-	+	+	+		+	-	+	-	-	-	-		-	-	-	-	-	+
DKFZ_2005_016_03	GER	BW	laboratory rat	kidney	col	++	-	2005	R. norvegicus	NA		ND	ND		t186	07-12-21-17-13-13-34-34-33-34	ND	CC88		-	-	3	-	-	-	-	-		-	+	-	-	-	-	-		-	-	-	-	-	-
DKFZ 520	GER	BW	laboratory rat	throat	col	++	-	2008	R. norvegicus	NA		ND	ND		t091	07-23-21-17-34-12-23-02-12-23	ND	CC7		-	-	1	-	-	+	-	+		-	-	+	-	-	-	-		-	-	-	-	-	+
DKFZ_2014_104_03	GER	BW	laboratory rat	gut content	col	++	-	2014	R. norvegicus	NA		ND	ND		t2091	14-12-17-23-18-17	ST5598	ST5598		-	gimnou	4	-	-	-	-	-		-	-	-	-	-	-	-		-	-	-	-	-	+
DKFZ566-01	GER	BW	laboratory rat	throat	col	++	-	2007	R. norvegicus	NA		ND	ND		t11193	07-23-21-17-34-12-16-23-02-12-23	ND	CC7		-	-	1	-	-	+	-	+		-	-	+	-	-	-	-		-	-	-	-	-	+
A734/2	GER	BW	laboratory rat	gut content	col	++	-	2014	R. norvegicus	NA		ND	ND		t127	07-23-21-16-34-33-13	ND	CC1		h	-	3	-	-	+	-	+		-	-	+	-	-	-	-		-	-	-	-	-	+
A734/3	GER	BW	laboratory rat	gut content	col	++	-	2014	R. norvegicus	NA		ND	ND		t127	07-23-21-16-34-33-13	ND	CC1		h	-	3	-	-	+	+	+		-	-	+	-	-	-	-		-	-	-	-	-	+
A735/1	GER	BW	laboratory rat	gut content	col	++	-	2014	R. norvegicus	NA		ND	ND		t091	07-23-21-17-34-12-23-02-12-23	ND	CC7		p	-	1	-	-	+	-	+		-	-	+	-	-	-	-		-	-	-	-	-	+
A754/1	GER	BW	laboratory rat	throat	col	++	-	2014	R. norvegicus	NA		ND	ND		t1767	11-19-12-21-17-34-24-24-34-22-25	ND	CC8		-	-	1	-	-	-	-	-		-	+	-	-	-	-	-		-	-	-	-	-	+
A754/3	GER	BW	laboratory rat	throat	col	++	-	2014	R. norvegicus	NA		ND	ND		t186	07-12-21-17-13-13-34-34-33-34	ND	CC88		-	-	3	-	-	-	-	-		+	+	-	-	-	-	-		-	-	-	-	-	-
A798/3	GER	BW	laboratory rat	throat	col	++	-	2014	R. norvegicus	NA		ND	ND		t2091	14-12-17-23-18-17	ND	ST5598		-	gimnou	4	-	-	-	-	-		-	-	-	-	-	-	-		-	-	-	-	-	+
1 Probability of contact to humans or livestock, based on the location of capture: -, no contact; + possible contact; ++, likely contact
2 includes different strains of laboratory rats (CD, Wistar, Sprague Dawley, Lewis); not cytB tested
3 S. aureus-specific latex agglutination test (ProlexTM Staph Xtra Latex Kit, Pro-Lab Diagnostics, Richmond Hill, ON, Canada)
4 spa types were clustered by BURP analysis into CCs and corresponding MLST CCs were deduced using the Ridom database
5 Staphylococcal enterotoxins (SEs) are indicated by single letters (a = sea, etc.); tst, toxic shock syndrome toxin 1 gene
6 egc, superantigen genes of the enterotoxin gene cluster, i.e. seg, sei, sem, sen, seo and seu
7 PenR, penicillin resistance (determined based on the MIC of penicillin against S. aureus strains using the Broth Microdilution Method; resistance breakpoint was set to ≥0.25 µg/mL): -: susceptible; +: resistant
Abbreviations: agr, accessory gene regulator; BW, Baden-Württemberg; CAN, Canada; CC, clonal complex; chp, gene encoding the chemotaxis inhibitory protein; col, colonization (nasopharyngeal sample); CR, Charles River; eta/etd, exfoliative toxins a and d; f, female; GER, Germany; HE; Hesse; JPN; Japan; m, male; mecA/mecB/mecC/mecD/mecU, methicillin resistance coding gene mecA/mecB/mecC/mecD/mecU; …

## Sheet: Tab S9_matched hu S.a.
Table S9: Genotype, virulence genes, and phage patterns of selected CC-matched human S. aureus isolates
	Epidemiology					Genotyping					Virulence genes											Resistances
Strain ID	Study	Year	Type of infection	Country		spa type	spa repeat succession	MLST	Deduced MLST CC1		MGE-carried SAg genes2	Non-MGE-carried SAg genes3	agr	eta	etd	pvl	sak	chp	scn	sa3int		mecA	mecB	mecC	mecD	mecU	Reference
sh38723	SHIP-Trend-0	2011	col	GER		t091	07-23-21-17-34-12-23-02-12-23	ND	CC7		p	-	1	-	-	-	+	-	+	+		-	ND	-	ND	-	[44]
sh37544	SHIP-Trend-0	2011	col	GER		t091	07-23-21-17-34-12-23-02-12-23	ND	CC7		p	-	1	-	-	-	+	-	+	+		-	ND	-	ND	-	[44]
sh39173	SHIP-Trend-0	2011	col	GER		t091	07-23-21-17-34-12-23-02-12-23	ND	CC7		p	-	1	-	-	-	+	+	+	+		-	ND	-	ND	-	[44]
sh41543	SHIP-Trend-0	2011	col	GER		t091	07-23-21-17-34-12-23-02-12-23	ND	CC7		-	-	1	-	-	-	+	-	+	+		-	ND	-	ND	-	[44]
sh40273	SHIP-Trend-0	2011	col	GER		t091	07-23-21-17-34-12-23-02-12-23	ND	CC7		p	-	1	-	-	-	+	-	+	+		-	ND	-	ND	-	[44]
sh42747	SHIP-Trend-0	2011	col	GER		t091	07-23-21-17-34-12-23-02-12-23	ND	CC7		p	-	1	-	-	-	+	-	+	+		-	ND	-	ND	-	[44]
sh42301	SHIP-Trend-0	2011	col	GER		t091	07-23-21-17-34-12-23-02-12-23	ND	CC7		p	-	1	-	-	-	+	-	+	+		-	ND	-	ND	-	[44]
sh43488_H6	SHIP-Trend-0	2011	col	GER		t091	07-23-21-17-34-12-23-02-12-23	ND	CC7		p	-	1	-	-	-	+	-	+	+		-	ND	-	ND	-	[44]
sh43489	SHIP-Trend-0	2011	col	GER		t091	07-23-21-17-34-12-23-02-12-23	ND	CC7		p	-	1	-	-	-	+	-	+	+		-	ND	-	ND	-	[44]
sh43097	SHIP-Trend-0	2011	col	GER		t091	07-23-21-17-34-12-23-02-12-23	ND	CC7		p	-	1	-	-	-	+	-	+	+		-	ND	-	ND	-	[44]
sh16776	SHIP-Trend-0	2009	col	GER		t008	11-19-12-21-17-34-24-34-22-25	ND	CC8		djr	-	1	-	-	-	+	-	+	+		-	ND	-	ND	-	[34, 44]
SH051-2	SH	2006	col	GER		t008	11-19-12-21-17-34-24-34-22-25	ND	CC8		djr	-	1	-	-	-	+	-	+	+		-	ND	-	ND	-	[34]
sh10760	SHIP-2	2009	col	GER		t008	11-19-12-21-17-34-24-34-22-25	ND	CC8		-	-	1	-	-	-	+	-	+	+		-	ND	-	ND	-	[34]
sh17959	SHIP-Trend-0	2009	col	GER		t008	11-19-12-21-17-34-24-34-22-25	ND	CC8		djr	-	1	-	-	-	+	-	+	+		-	ND	-	ND	-	[34, 44]
sh09046	SHIP-Trend-0	2009	col	GER		t008	11-19-12-21-17-34-24-34-22-25	ND	CC8		-	-	1	-		-	+	-	+	+		-	ND	-	ND	-	[44]
SH010-1	SH	2005	col	GER		t008	11-19-12-21-17-34-24-34-22-25	ND	CC8		djr	-	1	-	-	-	+	-	+	+		-	ND	-	ND	-	[34]
sh04757	SHIP-Trend-0	2009	col	GER		t008	11-19-12-21-17-34-24-34-22-25	ND	CC8		-	-	1	-	-	-	-	-	-	-		-	ND	-	ND	-	[44]
T169-1	T	2002	col	GER		t711	04-21-17-34-24-34-22-25	ND	CC8		bkq djr	-	1	-	-	-	+	-	+	+		-	ND	-	ND	-	[34]
SH131-1	SH	2005	col	GER		t723	11-19-12-34-22-25	ND	CC8		a djr	-	1	-	-	-	+	-	+	+		-	ND	-	ND	-	[34]
sh10781	SHIP-Trend-0	2009	col	GER		t955	11-19-12-21-17-34-24-34-22-33-25	ND	CC8		p	-	1	-	-	-	+	-	+	+		-	ND	-	ND	-	[34, 44]
05V09262	collaboration	2005	ostitis femur	GER		t208	04-20-17-17-31-31-24-17-17-17-17-25	ND	CC49		-	-	2	-	-	-	+	+	+	+		-	ND	-	ND	-	-
06-01225	collaboration	2006	wound infection	GER		t208	04-20-17-17-31-31-24-17-17-17-17-25	ST49	CC49		-	-	2	-	-	-	-	-	-	-		-	ND	-	ND	-	-
08B7532	collaboration	2008	blood culture	GER		t208	04-20-17-17-31-31-24-17-17-17-17-25	ND	CC49		-	-	2	-	-	-	+	+	+	+		-	ND	-	ND	-	-
09-03510	collaboration	2009	MRSA screening	GER		t4189	04-20-17-17-31-31-24-17-17-17-25	ST49	CC49		-	-	2	-	-	-	+	+	+	+		+	ND	-	ND	+	-
A50	other	2007	febrile neutropenia	NZL		t186	07-12-21-17-13-13-34-34-33-34	ST78	CC88		-	-	3	-	-	-	+	-	+	+		-	ND	-	ND	-	[34]
M25	other	2007	endocarditis	NZL		t186	07-12-21-17-13-13-34-34-33-34	ST88	CC88		-	-	3	+	-	-	+	-	+	+		-	ND	-	ND	-	[34]
M3	other	2007	SSTI	NZL		t186	07-12-21-17-13-13-34-34-33-34	ST88	CC88		-	-	3	-	-	-	+	-	+	+		-	ND	-	ND	-	[34]
Z1350	collaboration	2006	unknown	AUS		t186	07-12-21-17-13-13-34-34-33-34	ND	CC88		-	-	3	-	-	-	+	-	+	+		+	ND	-	ND	+	[34]
Z1377	collaboration	2009	unknown	AUS		t186	07-12-21-17-13-13-34-34-33-34	ND	CC88		cl	-	3	-	-	-	+	-	+	+		+	ND	-	ND	+	[34]
SM_A247	collaboration	2012	SSTI	GER/THA		t2526	07-12-21-17-13-13-13-34-33-13	ND	CC88		p	-	3	-	-	+	+	+	+	+		-	ND	-	ND	-	[34]
SM_A189	collaboration	2010	SSTI	GER		t3341	26-12-21-17-13-34-34-34-33-34	ND	CC88		-	-	3	-	-	+	+	-	+	+		-	ND	-	ND	-	[34]
FS208	other	2009	sepsis	FIN		t448	07-12-21-17-13-13-34-33-34	ND	CC88		cl	-	3	-	-	-	+	-	+	+		-	ND	-	ND	-	[34]
SM_Z1208	collaboration	2009	unknown	KSA		t690	07-12-21-17-13-13-34-34-34-33-34	ND	CC88		p kq	-	3	-	-	+	+	+	+	+		+	ND	-	ND	+	[34]
Z1383	collaboration	2000	unknown	AUS		t786	07-12-21-17-13-34-34-33-34	ND	CC88		cl	-	3	-	-	-	+	-	+	+		+	ND	-	ND	+	[34]
08-02742	collaboration	2008	MRSA screening	GER		t1736	04-82-17-25-16-17	ST130	CC130		-	-	3	-	-	-	-	-	-	-		-	ND	+	ND	+	-
10-00991	collaboration	2010	wound infection	GER		t1736	04-82-17-25-16-17	ST130	CC130		-	-	3	-	-	-	-	-	-	-		-	ND	+	ND	+	-
11-01497	collaboration	2011	pneumonia	GER		t1736	04-82-17-25-16-17	ND	CC130		-	-	3	-	-	-	-	-	-	-		-	ND	+	ND	+	-
09-01300	collaboration	2009	dermatitis	GER		t1773	4-82-17-25-17	ST130	CC130		-	-	3	-	-	-	-	-	-	-		-	ND	+	ND	+	-
13-01673	collaboration	2013	MRSA screening	GER		t1773	04-82-17-25-17	ND	CC130		-	-	3	-	-	-	-	-	-	-		-	ND	+	ND	+	-
16-02222	collaboration	2016	col	GER		t1773	04-82-17-25-17	ND	CC130		-	-	3	-	-	-	-	-	-	-		-	ND	+	ND	+	-
15-01986	collaboration	2015	bacteremia	GER		t843	04-82-17-25-17-25-25-16-17	ST130	CC130		-	-	3	-	-	-	-	-	-	-		-	ND	+	ND	+	-
12-03171	collaboration	2012	abscess	GER		t843	04-82-17-25-17-25-25-16-17	ND	CC130		-	-	3	-	-	-	-	-	-	-		-	ND	+	ND	+	-
15-01861	collaboration	2015	MRSA screening	GER		t843	04-82-17-25-17-25-25-16-17	ND	CC130		-	-	3	-	-	-	-	-	-	-		-	ND	+	ND	+	-
sh09248	SHIP-Trend-0	2009	col	GER		t034	08-16-02-25-02-25-34-24-25	ST398	CC398		-	-	1	-	-	-	-	-	-	-		-	ND	-	ND	-	[44]
sh42507	SHIP-Trend-0	2011	col	GER		t034	08-16-02-25-02-25-34-24-25	ND	CC398		-	-	1	-	-	+	-	-	-	-		+	ND	-	ND	+	[44]
sh33199	SHIP-Trend-0	2010	col	GER		t11055	08-16-02-25-02-25-36-25	ST398	CC398		-	-	1	-	-	-	+	+	+	+		-	ND	-	ND	-	[44]
sh49730	SHIP-Trend-0	2012	col	GER		t11377	08-16-159-25-02-25-34-34-25	ST398	CC398		-	-	1	-	-	-	-	+	+	+		-	ND	-	ND	-	[44]
sh25416	SHIP-Trend-0	2010	col	GER		t1451	08-16-02-25-34-25	ST398	CC398		-	-	1	-	-	-	-	+	+	+		-	ND	-	ND	-	[44]
sh05143	SHIP-Trend-0	2009	col	GER		t3307	08-12-16-02-25-02-25-34-25	ST398	CC398		-	-	1	-	-	-	-	+	+	+		-	ND	-	ND	-	[44]
sh24171	SHIP-2	2010	col	GER		t3307	08-12-16-02-25-02-25-34-25	ST398	CC398		-	-	1	-	-	-	+	-	+	+		-	ND	-	ND	-	-
1 spa types were clustered by BURP analysis into CCs and corresponding MLST CCs were deduced using the Ridom database.
2 Staphylococcal enterotoxins (SEs) are indicated by single letters (a = sea, etc.); tst, toxic shock syndrome toxin 1 gene
3 egc, superantigen genes of the enterotoxin gene cluster, i.e. seg, sei, sem, sen, seo and seu
Abbreviations: agr, accessory gene regulator; AUS, Australia; CC, clonal complex; chp, gene encoding the chemotaxis inhibitory protein; col, colonization (nasopharyngeal sample); eta/etd, exfoliative toxins a and d; FIN, Finland; GER, Germany; KSA, Kingdom of Saudia Arabia; mecA/mecB/mecC/mecD/mecU; methicillin resistance-coding gene mecA/mecB/mecC/mecD/mecU; MGE, mobile genetic elements; MLST, m…
